# Supplementary material
Source: PubMed Central journal article supplement (PMC3698990)
Supplement: supp_kws431_kws431_Web_Material.pdf [file supp_kws431_kws431_Web_Material.pdf]

## **Web Appendix**

### **MATERIALS AND METHODS**

#### **Study population**

We utilized the data from two prospective cohort studies, the Nurses' Health Study (NHS, which started in 1976) and the Health Professionals Follow-up Study (HPFS, which started in 1986) (1, 2). Questionnaires were sent to participants every two years to update information on smoking status, diet, and other lifestyle factors, and to identify newly diagnosed diseases. In the present study, we excluded men and women with a baseline history of cancer (except non-melanoma skin cancer). We also excluded the participants who did not provide smoking information on the baseline questionnaire. A total of 88,397 women and 45,807 men were eligible for inclusion in the analysis. Based on the availability of adequate follow-up and tumor molecular data, 1,260 colorectal cancer cases, diagnosed from 1980 through 2008, were used as outcome data. Baseline characteristics of participants without available tumor molecular information were similar to those for cases with available data [age at diagnosis, 66.1 vs. 66.4 years old; never smoker, 40.6% vs. 39.9%; mean cumulative pack-years smoked, 14.8 vs. 14.9; mean pack-years smoked before age 30, 4.8 vs. 4.9; age at start of smoking 20 years old or younger, 31.7% vs. 31.3%; body mass index (BMI)  $\geq 30$  kg/m<sup>2</sup>, 10.8% vs. 10.8% (P>0.1 for all comparisons)].

Informed consent was obtained from all participants. This study was approved by the Human Subjects Committees at Harvard School of Public Health and Brigham and Women's Hospital.

### **Assessment of incident colorectal cancer**

Every two years, participants were asked whether they had received a new diagnosis colon or rectal cancer. In addition, the National Death Index was searched to ascertain deaths, and any diagnosis of colorectal cancer that contributed to death or that was a secondary diagnosis (3). For putative colorectal cancer cases, the medical records were reviewed, and cases with carcinoma-in-situ, non-epithelial tumors, and metastases from other body sites were excluded. We retrieved formalin-fixed paraffin-embedded colorectal cancer tissue blocks from hospitals throughout the U.S. where participants with colorectal cancer had undergone surgical resection (4). We collected diagnostic biopsy specimens for rectal cancer patients who received preoperative treatment, to minimize bias from treatment. Hematoxylin and eosin stained tissue sections from all colorectal cancer cases were reviewed by a pathologist (S.O.).

### **DNA extraction, Pyrosequencing of *BRAF*, and microsatellite instability (MSI) analysis**

DNA was extracted from paraffin embedded tissue. PCR and Pyrosequencing were performed for *BRAF* codon 600 (5). MSI analysis was performed using 10 microsatellite markers (D2S123, D5S346, D17S250, BAT25, BAT26, BAT40, D18S55, D18S56, D18S67, and D18S487) (6). MSI-high was defined as instability in  $\geq 30\%$  of the markers, and microsatellite stability (MSS) was defined as instability in 0-29% of the markers (MSI-low cancers were incorporated into MSS cancers because both display similar features).

### **Methylation analysis for CpG islands**

Using validated bisulfite DNA treatment and real-time PCR (MethyLight), we quantified DNA methylation in eight CIMP-specific promoters [*CACNA1G*, *CDKN2A* (p16), *CRABP1*, *IGF2*, *MLH1*, *NEUROG1*, *RUNX3* and *SOCS1*] (6-9). CIMP-high was defined as the presence of  $\geq 6/8$  methylated promoters and CIMP-low/negative was defined as 0/8-5/8 methylated promoters, according to previously established criteria (6-9).

### **Immunohistochemistry for DNMT3B**

DNMT3B results were limited to cases where tumor tissues were available for tissue microarray (TMA) construction. Immunohistochemistry for DNMT3B (HGNC ID: 2979) using TMA was performed as previously described (10), using a monoclonal primary antibody against DNMT3B (1:150 dilution; catalog No. IMG-184A; clone 52A1018; Imgenex, San Diego, CA). This antibody was generated using full-length mouse recombinant Dnmt3b, and has been demonstrated to recognize human DNMT3B ([www.imgenex.com/antibody\\_details.php?catalog=IMG-184A](http://www.imgenex.com/antibody_details.php?catalog=IMG-184A)). DNMT3B positivity (i.e., overexpression) was defined as  $\geq 30\%$  of tumor cells with at least weak nuclear staining. Appropriate positive and negative controls were included in each run of immunohistochemistry. All immunohistochemically-stained slides were interpreted by one of the investigators (K.N.) unaware of other data. A random selection of 141 cases was examined by a second observer (K.S.) unaware of other data; concordance between the two observers was 0.91 ( $\kappa=0.60$ ,  $P<0.001$ ), indicating substantial agreement (10).

## REFERENCES

1. Chan AT, Ogino S, Fuchs CS. Aspirin and the risk of colorectal cancer in relation to the expression of COX-2. *N Engl J Med* 2007;356(21):2131-2142.
2. Liao X, Lochhead P, Nishihara R, et al. Aspirin Use, Tumor PIK3CA Mutation Status, and Colorectal Cancer Survival *N Engl J Med* 2012;367(17):1596-1606.
3. Yamauchi M, Morikawa T, Kuchiba A, et al. Assessment of colorectal cancer molecular features along bowel subsites challenges the conception of distinct dichotomy of proximal versus distal colorectum. *Gut* 2012;61(6):847-854.
4. Morikawa T, Kuchiba A, Yamauchi M, et al. Association of CTNNB1 (beta-catenin) alterations, body mass index, and physical activity with survival in patients with colorectal cancer. *JAMA* 2011;305(16):1685-1694.
5. Ogino S, Kawasaki T, Kirkner GJ, et al. CpG island methylator phenotype-low (CIMP-low) in colorectal cancer: possible associations with male sex and KRAS mutations. *J Mol Diagn* 2006;8(5):582-588.
6. Nosho K, Irahara N, Shima K, et al. Comprehensive biostatistical analysis of CpG island methylator phenotype in colorectal cancer using a large population-based sample. *PLoS One* 2008;3(11):e3698.
7. Weisenberger DJ, Siegmund KD, Campan M, et al. CpG island methylator phenotype underlies sporadic microsatellite instability and is tightly associated with BRAF mutation in colorectal cancer. *Nat Genet* 2006;38(7):787-793.
8. Ogino S, Nosho K, Kirkner GJ, et al. CpG island methylator phenotype, microsatellite instability, BRAF mutation and clinical outcome in colon cancer. *Gut* 2009;58(1):90-96.
9. Ogino S, Kawasaki T, Brahmandam M, et al. Precision and performance characteristics of bisulfite conversion and real-time PCR (MethyLight) for quantitative DNA methylation analysis. *J Mol Diagn* 2006;8(2):209-217.
10. Nosho K, Shima K, Irahara N, et al. DNMT3B expression might contribute to CpG island methylator phenotype in colorectal cancer. *Clin Cancer Res* 2009;15(11):3663-3671.

Web Table 1. Relations between tumor molecular features, tumor location, and sex in 1,260 colorectal cancer cases in the Nurses' Health Study (1980-2008) and the Health Professionals Follow-up Study (1986-2008)

|                |                          | Within each of these subsets of cancer cases |                     |                                 |                            |                                     |                  |
|----------------|--------------------------|----------------------------------------------|---------------------|---------------------------------|----------------------------|-------------------------------------|------------------|
|                |                          | CIMP-high<br>(N=205)                         | MSI-high<br>(N=188) | <i>BRAF</i> -mutated<br>(N=178) | DNMT3B-positive<br>(N=108) | Proximal<br>colon cancer<br>(N=591) | Women<br>(N=718) |
| Prevalence of: | CIMP-high                |                                              | 76%                 | 73%                             | 32%                        | 32%                                 | 21%              |
|                | MSI-high                 | 68%                                          |                     | 56%                             | 27%                        | 29%                                 | 19%              |
|                | <i>BRAF</i> -mutated     | 62%                                          | 52%                 |                                 | 26%                        | 25%                                 | 20%              |
|                | DNMT3B-positive          | 31%                                          | 29%                 | 28%                             |                            | 21%                                 | 16%              |
|                | Proximal colon<br>cancer | 87%                                          | 87%                 | 82%                             | 60%                        |                                     | 50%              |
|                | Women                    | 70%                                          | 68%                 | 76%                             | 66%                        | 60%                                 |                  |

Abbreviations: CIMP, CpG island methylator phenotype; DNMT3B, DNA methyltransferase 3B; MSI, microsatellite instability.

Web Table 2. Duration of Smoking Cessation and Incident Colorectal Cancer Risk by Molecular Subtypes<sup>a</sup> in the Nurses' Health Study (1980-2008) or the Health Professionals Follow-up Study (1986-2008)

|                              | Current smoker |          | Cessation 1-4 years |            | Cessation 5-9 years |            | Cessation 10-19 years |            | Cessation 20-39 years |            | Cessation ≥40 years |            | $P_{\text{trend}}^b$ | $P_{\text{heterogeneity}}^c$ |
|------------------------------|----------------|----------|---------------------|------------|---------------------|------------|-----------------------|------------|-----------------------|------------|---------------------|------------|----------------------|------------------------------|
|                              | HR             |          | HR                  | 95% CI     | HR                  | 95% CI     | HR                    | 95% CI     | HR                    | 95% CI     | HR                  | 95% CI     |                      |                              |
| <b>Women</b>                 |                |          |                     |            |                     |            |                       |            |                       |            |                     |            |                      |                              |
| Person-years                 |                | 381,181  |                     | 125,752    |                     | 119,058    |                       | 238,551    |                       | 338,742    |                     | 62,676     |                      |                              |
| <b>All colorectal cancer</b> |                |          |                     |            |                     |            |                       |            |                       |            |                     |            |                      |                              |
| N                            |                | 101      |                     | 38         |                     | 65         |                       | 85         |                       | 111        |                     | 29         |                      |                              |
| Age-adjusted                 | 1              | Referent | 0.98                | 0.67, 1.42 | 1.51                | 1.11, 2.07 | 1.02                  | 0.76, 1.36 | 0.80                  | 0.61, 1.05 | 0.79                | 0.52, 1.21 | 0.003                |                              |
| Multivariate <sup>d</sup>    | 1              | Referent | 0.99                | 0.68, 1.43 | 1.52                | 1.11, 2.08 | 1.01                  | 0.75, 1.36 | 0.79                  | 0.60, 1.05 | 0.79                | 0.51, 1.21 | 0.004                |                              |
| <b>CIMP status</b>           |                |          |                     |            |                     |            |                       |            |                       |            |                     |            |                      |                              |
| CIMP-low/negative            |                |          |                     |            |                     |            |                       |            |                       |            |                     |            |                      |                              |
| N                            |                | 71       |                     | 25         |                     | 51         |                       | 67         |                       | 89         |                     | 20         |                      |                              |
| Age-adjusted                 | 1              | Referent | 0.93                | 0.59, 1.47 | 1.77                | 1.23, 2.55 | 1.21                  | 0.86, 1.70 | 0.98                  | 0.71, 1.34 | 0.91                | 0.55, 1.52 | 0.16                 |                              |
| Multivariate <sup>d</sup>    | 1              | Referent | 0.94                | 0.59, 1.48 | 1.79                | 1.24, 2.57 | 1.21                  | 0.86, 1.70 | 0.97                  | 0.70, 1.34 | 0.91                | 0.54, 1.52 | 0.19                 | 0.01                         |
| CIMP-high                    |                |          |                     |            |                     |            |                       |            |                       |            |                     |            |                      |                              |
| N                            |                | 25       |                     | 12         |                     | 12         |                       | 15         |                       | 18         |                     | 7          |                      |                              |
| Age-adjusted                 | 1              | Referent | 1.12                | 0.56, 2.23 | 0.90                | 0.45, 1.81 | 0.56                  | 0.29, 1.06 | 0.39                  | 0.21, 0.72 | 0.44                | 0.19, 1.02 | 0.0003               |                              |
| Multivariate <sup>d</sup>    | 1              | Referent | 1.14                | 0.57, 2.27 | 0.90                | 0.45, 1.80 | 0.56                  | 0.29, 1.07 | 0.39                  | 0.21, 0.73 | 0.43                | 0.18, 1.02 | 0.001                |                              |
| <b>MSI status</b>            |                |          |                     |            |                     |            |                       |            |                       |            |                     |            |                      |                              |
| MSS                          |                |          |                     |            |                     |            |                       |            |                       |            |                     |            |                      |                              |
| N                            |                | 76       |                     | 24         |                     | 52         |                       | 65         |                       | 91         |                     | 20         |                      |                              |
| Age-adjusted                 | 1              | Referent | 0.84                | 0.53, 1.32 | 1.67                | 1.17, 2.38 | 1.08                  | 0.77, 1.51 | 0.91                  | 0.67, 1.24 | 0.83                | 0.50, 1.38 | 0.09                 |                              |
| Multivariate <sup>d</sup>    | 1              | Referent | 0.84                | 0.53, 1.34 | 1.67                | 1.17, 2.39 | 1.08                  | 0.77, 1.51 | 0.91                  | 0.66, 1.24 | 0.83                | 0.50, 1.38 | 0.10                 | 0.05                         |
| MSI-high                     |                |          |                     |            |                     |            |                       |            |                       |            |                     |            |                      |                              |
| N                            |                | 21       |                     | 12         |                     | 10         |                       | 14         |                       | 14         |                     | 8          |                      |                              |
| Age-adjusted                 | 1              | Referent | 1.34                | 0.65, 2.72 | 0.92                | 0.43, 1.96 | 0.65                  | 0.33, 1.28 | 0.38                  | 0.19, 0.76 | 0.61                | 0.27, 1.41 | 0.002                |                              |
| Multivariate <sup>d</sup>    | 1              | Referent | 1.35                | 0.66, 2.76 | 0.91                | 0.43, 1.94 | 0.65                  | 0.33, 1.28 | 0.38                  | 0.19, 0.76 | 0.61                | 0.26, 1.40 | 0.003                |                              |

**BRAF mutation status***BRAF*-wildtype

|                           |   |          |      |            |      |            |      |            |      |            |      |            |      |      |
|---------------------------|---|----------|------|------------|------|------------|------|------------|------|------------|------|------------|------|------|
| N                         |   | 79       | 25   | 51         | 65   | 91         | 22   |            |      |            |      |            |      |      |
| Age-adjusted              | 1 | Referent | 0.84 | 0.53, 1.32 | 1.56 | 1.09, 2.22 | 1.01 | 0.73, 1.41 | 0.86 | 0.63, 1.17 | 0.84 | 0.51, 1.36 | 0.06 |      |
| Multivariate <sup>d</sup> | 1 | Referent | 0.85 | 0.54, 1.33 | 1.56 | 1.09, 2.23 | 1.00 | 0.72, 1.40 | 0.85 | 0.62, 1.16 | 0.83 | 0.51, 1.36 | 0.07 | 0.11 |

*BRAF*-mutated

|                           |   |          |      |            |      |            |      |            |      |            |      |            |      |  |
|---------------------------|---|----------|------|------------|------|------------|------|------------|------|------------|------|------------|------|--|
| N                         |   | 19       | 11   | 12         | 16   | 17         | 6    |            |      |            |      |            |      |  |
| Age-adjusted              | 1 | Referent | 1.34 | 0.63, 2.83 | 1.29 | 0.62, 2.68 | 0.92 | 0.47, 1.80 | 0.56 | 0.29, 1.08 | 0.62 | 0.24, 1.57 | 0.01 |  |
| Multivariate <sup>d</sup> | 1 | Referent | 1.35 | 0.64, 2.85 | 1.29 | 0.62, 2.67 | 0.92 | 0.47, 1.82 | 0.56 | 0.29, 1.08 | 0.62 | 0.24, 1.58 | 0.01 |  |

**DNMT3B expression status**

## DNMT3B-negative

|                           |   |          |      |            |      |            |      |            |      |            |      |            |      |      |
|---------------------------|---|----------|------|------------|------|------------|------|------------|------|------------|------|------------|------|------|
| N                         |   | 61       | 22   | 30         | 44   | 59         | 6    |            |      |            |      |            |      |      |
| Age-adjusted              | 1 | Referent | 0.96 | 0.59, 1.56 | 1.24 | 0.80, 1.92 | 1.05 | 0.71, 1.55 | 0.89 | 0.62, 1.29 | 0.49 | 0.21, 1.16 | 0.06 |      |
| Multivariate <sup>d</sup> | 1 | Referent | 0.97 | 0.59, 1.58 | 1.26 | 0.81, 1.96 | 1.07 | 0.72, 1.58 | 0.91 | 0.63, 1.32 | 0.50 | 0.21, 1.18 | 0.08 | 0.14 |

## DNMT3B-positive

|                           |   |          |      |            |      |            |      |            |      |            |      |            |      |  |
|---------------------------|---|----------|------|------------|------|------------|------|------------|------|------------|------|------------|------|--|
| N                         |   | 12       | 3    | 7          | 2    | 8          | 1    |            |      |            |      |            |      |  |
| Age-adjusted              | 1 | Referent | 0.67 | 0.19, 2.38 | 1.31 | 0.51, 3.37 | 0.20 | 0.04, 0.90 | 0.49 | 0.20, 1.22 | 0.29 | 0.04, 2.30 | 0.03 |  |
| Multivariate <sup>d</sup> | 1 | Referent | 0.69 | 0.19, 2.45 | 1.34 | 0.52, 3.43 | 0.21 | 0.05, 0.96 | 0.52 | 0.21, 1.29 | 0.29 | 0.04, 2.30 | 0.03 |  |

**Men**

|              |  |        |        |        |        |         |        |  |  |  |  |  |  |  |
|--------------|--|--------|--------|--------|--------|---------|--------|--|--|--|--|--|--|--|
| Person-years |  | 58,327 | 36,153 | 36,662 | 74,205 | 172,684 | 64,012 |  |  |  |  |  |  |  |
|--------------|--|--------|--------|--------|--------|---------|--------|--|--|--|--|--|--|--|

**All colorectal cancer**

|                           |   |          |      |            |      |            |      |            |      |            |      |            |      |  |
|---------------------------|---|----------|------|------------|------|------------|------|------------|------|------------|------|------------|------|--|
| N                         |   | 38       | 22   | 21         | 44   | 131        | 76   |            |      |            |      |            |      |  |
| Age-adjusted              | 1 | Referent | 0.93 | 0.55, 1.58 | 0.87 | 0.51, 1.49 | 0.81 | 0.52, 1.25 | 0.91 | 0.63, 1.31 | 0.92 | 0.61, 1.37 | 0.78 |  |
| Multivariate <sup>d</sup> | 1 | Referent | 0.97 | 0.57, 1.65 | 0.89 | 0.52, 1.52 | 0.85 | 0.54, 1.32 | 0.97 | 0.67, 1.41 | 1.01 | 0.67, 1.52 | 0.83 |  |

**CIMP status**

## CIMP-low/negative

|                           |   |          |      |            |      |            |      |            |      |            |      |            |      |      |
|---------------------------|---|----------|------|------------|------|------------|------|------------|------|------------|------|------------|------|------|
| N                         |   | 32       | 17   | 15         | 38   | 105        | 52   |            |      |            |      |            |      |      |
| Age-adjusted              | 1 | Referent | 0.83 | 0.46, 1.50 | 0.72 | 0.39, 1.34 | 0.82 | 0.51, 1.33 | 0.87 | 0.58, 1.31 | 0.82 | 0.52, 1.30 | 0.59 |      |
| Multivariate <sup>d</sup> | 1 | Referent | 0.86 | 0.47, 1.56 | 0.74 | 0.40, 1.38 | 0.87 | 0.54, 1.41 | 0.95 | 0.63, 1.42 | 0.91 | 0.57, 1.45 | 0.97 | 0.70 |

## CIMP-high

|                           |   |          |      |            |      |            |      |            |      |            |      |            |      |  |
|---------------------------|---|----------|------|------------|------|------------|------|------------|------|------------|------|------------|------|--|
| N                         |   | 6        | 3    | 3          | 3    | 19         | 9    |            |      |            |      |            |      |  |
| Age-adjusted              | 1 | Referent | 0.99 | 0.24, 4.00 | 0.84 | 0.21, 3.40 | 0.38 | 0.09, 1.55 | 0.80 | 0.31, 2.05 | 0.57 | 0.19, 1.65 | 0.51 |  |
| Multivariate <sup>d</sup> | 1 | Referent | 1.09 | 0.27, 4.44 | 0.90 | 0.22, 3.66 | 0.43 | 0.11, 1.77 | 0.88 | 0.34, 2.26 | 0.66 | 0.22, 1.95 | 0.66 |  |

| <b>MSI status</b>               |   |          |      |            |      |            |      |            |      |            |      |            |      |      |
|---------------------------------|---|----------|------|------------|------|------------|------|------------|------|------------|------|------------|------|------|
| <b>MSS</b>                      |   |          |      |            |      |            |      |            |      |            |      |            |      |      |
| N                               |   |          | 32   | 16         | 16   | 36         | 110  | 66         |      |            |      |            |      |      |
| Age-adjusted                    | 1 | Referent | 0.79 | 0.43, 1.44 | 0.78 | 0.43, 1.44 | 0.78 | 0.48, 1.27 | 0.90 | 0.60, 1.35 | 0.95 | 0.61, 1.48 | 0.88 |      |
| Multivariate <sup>d</sup>       | 1 | Referent | 0.82 | 0.45, 1.50 | 0.80 | 0.43, 1.46 | 0.81 | 0.50, 1.32 | 0.96 | 0.64, 1.44 | 1.04 | 0.66, 1.62 | 0.56 | 0.25 |
| <b>MSI-high</b>                 |   |          |      |            |      |            |      |            |      |            |      |            |      |      |
| N                               |   |          | 6    | 4          | 4    | 6          | 16   | 9          |      |            |      |            |      |      |
| Age-adjusted                    | 1 | Referent | 1.09 | 0.30, 3.91 | 1.13 | 0.31, 4.05 | 0.70 | 0.22, 2.19 | 0.66 | 0.25, 1.70 | 0.56 | 0.19, 1.63 | 0.21 |      |
| Multivariate <sup>d</sup>       | 1 | Referent | 1.13 | 0.32, 4.07 | 1.16 | 0.32, 4.17 | 0.74 | 0.23, 2.33 | 0.71 | 0.27, 1.86 | 0.63 | 0.22, 1.86 | 0.32 |      |
| <b>BRAF mutation status</b>     |   |          |      |            |      |            |      |            |      |            |      |            |      |      |
| <b>BRAF-wildtype</b>            |   |          |      |            |      |            |      |            |      |            |      |            |      |      |
| N                               |   |          | 35   | 17         | 19   | 40         | 116  | 67         |      |            |      |            |      |      |
| Age-adjusted                    | 1 | Referent | 0.75 | 0.42, 1.35 | 0.84 | 0.48, 1.47 | 0.79 | 0.50, 1.25 | 0.85 | 0.58, 1.25 | 0.85 | 0.56, 1.31 | 0.75 |      |
| Multivariate <sup>d</sup>       | 1 | Referent | 0.78 | 0.44, 1.41 | 0.86 | 0.49, 1.50 | 0.82 | 0.52, 1.30 | 0.91 | 0.61, 1.34 | 0.93 | 0.60, 1.43 | 0.88 | 0.98 |
| <b>BRAF-mutated</b>             |   |          |      |            |      |            |      |            |      |            |      |            |      |      |
| N                               |   |          | 3    | 3          | 1    | 3          | 13   | 7          |      |            |      |            |      |      |
| Age-adjusted                    | 1 | Referent | 2.37 | 0.46, 12.0 | 0.61 | 0.06, 5.96 | 0.73 | 0.15, 3.69 | 1.37 | 0.38, 4.95 | 1.14 | 0.28, 4.67 | 0.93 |      |
| Multivariate <sup>d</sup>       | 1 | Referent | 2.39 | 0.47, 12.1 | 0.59 | 0.06, 5.74 | 0.76 | 0.15, 3.86 | 1.40 | 0.39, 5.06 | 1.22 | 0.30, 5.01 | 0.98 |      |
| <b>DNMT3B expression status</b> |   |          |      |            |      |            |      |            |      |            |      |            |      |      |
| <b>DNMT3B-negative</b>          |   |          |      |            |      |            |      |            |      |            |      |            |      |      |
| N                               |   |          | 12   | 13         | 8    | 28         | 64   | 31         |      |            |      |            |      |      |
| Age-adjusted                    | 1 | Referent | 1.72 | 0.78, 3.81 | 1.03 | 0.42, 2.53 | 1.71 | 0.86, 3.39 | 1.51 | 0.81, 2.83 | 1.65 | 0.83, 3.29 | 0.40 |      |
| Multivariate <sup>d</sup>       | 1 | Referent | 1.76 | 0.80, 3.89 | 1.05 | 0.43, 2.59 | 1.79 | 0.90, 3.55 | 1.60 | 0.86, 3.00 | 1.82 | 0.91, 3.64 | 0.19 | 0.08 |
| <b>DNMT3B-positive</b>          |   |          |      |            |      |            |      |            |      |            |      |            |      |      |
| N                               |   |          | 5    | 2          | 1    | 3          | 8    | 4          |      |            |      |            |      |      |
| Age-adjusted                    | 1 | Referent | 0.92 | 0.18, 4.83 | 0.34 | 0.04, 2.98 | 0.49 | 0.11, 2.10 | 0.43 | 0.14, 1.35 | 0.39 | 0.10, 1.53 | 0.15 |      |
| Multivariate <sup>d</sup>       | 1 | Referent | 0.94 | 0.18, 4.96 | 0.35 | 0.04, 3.03 | 0.50 | 0.12, 2.17 | 0.45 | 0.15, 1.41 | 0.40 | 0.10, 1.60 | 0.17 |      |

Abbreviations: CI, confidence interval; CIMP, CpG island methylator phenotype; DNMT3B, DNA methyltransferase 3B; HR, hazard ratio; MSI, microsatellite instability; MSS, microsatellite stable; N, No. of cases.

<sup>a</sup> All models were stratified with age.

<sup>b</sup> Based on the linear trend test across the median values in each category. To test whether duration of smoking cessation reduced the cancer risk compared with current smoking, trend test and heterogeneity test were performed on current and past smokers excluding never smokers.

<sup>c</sup> Tests for heterogeneity (for a multivariate HR linear trend) showed significance of differential association of cessation with colorectal cancer risk by molecular subtypes. (i.e., CIMP-low/negative vs. CIMP-high; MSS vs. MSI-high; *BRAF*-wildtype vs. *BRAF*-mutated; DNMT3B-negative vs. DNMT3B-positive).

<sup>d</sup> Models were adjusted for body mass index, family history of colorectal cancer in any first-degree relative, regular use of aspirin, physical activity level, alcohol consumption, total caloric intake and red meat intake.



Web Table 3. Duration of Smoking Cessation and Incident Colorectal Cancer Risk by Cancer Anatomical Subsites and Molecular Subtypes<sup>a</sup> in the Nurses' Health Study (1980-2008) and the Health Professionals Follow-up Study (1986-2008)

|                              | Current smoker |          | Cessation 1-4 years |            | Cessation 5-9 years |            | Cessation 10-19 years |            | Cessation 20-39 years |            | Cessation ≥40 years |            | <i>P</i> <sub>trend</sub> <sup>b</sup> | <i>P</i> <sub>heterogeneity</sub> <sup>c</sup> |
|------------------------------|----------------|----------|---------------------|------------|---------------------|------------|-----------------------|------------|-----------------------|------------|---------------------|------------|----------------------------------------|------------------------------------------------|
|                              | HR             |          | HR                  | 95% CI     | HR                  | 95% CI     | HR                    | 95% CI     | HR                    | 95% CI     | HR                  | 95% CI     |                                        |                                                |
| Person-years                 |                | 439,508  |                     | 161,905    |                     | 155,720    |                       | 312,757    |                       | 511,426    |                     | 126,688    |                                        |                                                |
| <b>Proximal colon cancer</b> |                |          |                     |            |                     |            |                       |            |                       |            |                     |            |                                        |                                                |
| <b>CIMP status</b>           |                |          |                     |            |                     |            |                       |            |                       |            |                     |            |                                        |                                                |
| CIMP-low/negative            |                |          |                     |            |                     |            |                       |            |                       |            |                     |            |                                        |                                                |
| N                            |                | 34       |                     | 16         |                     | 25         |                       | 37         |                       | 75         |                     | 28         |                                        |                                                |
| Age-adjusted                 | 1              | Referent | 1.08                | 0.59, 1.96 | 1.48                | 0.88, 2.49 | 1.07                  | 0.67, 1.72 | 1.06                  | 0.70, 1.61 | 0.95                | 0.56, 1.61 | 0.35                                   |                                                |
| Multivariate <sup>d</sup>    | 1              | Referent | 1.09                | 0.60, 1.98 | 1.51                | 0.89, 2.54 | 1.09                  | 0.68, 1.76 | 1.07                  | 0.70, 1.63 | 0.97                | 0.57, 1.65 | 0.49                                   | 0.06                                           |
| CIMP-high                    |                |          |                     |            |                     |            |                       |            |                       |            |                     |            |                                        |                                                |
| N                            |                | 26       |                     | 15         |                     | 13         |                       | 18         |                       | 30         |                     | 15         |                                        |                                                |
| Age-adjusted                 | 1              | Referent | 1.32                | 0.70, 2.50 | 0.94                | 0.48, 1.83 | 0.62                  | 0.34, 1.14 | 0.52                  | 0.30, 0.89 | 0.56                | 0.29, 1.09 | 0.003                                  |                                                |
| Multivariate <sup>d</sup>    | 1              | Referent | 1.36                | 0.72, 2.59 | 0.96                | 0.49, 1.87 | 0.64                  | 0.35, 1.19 | 0.52                  | 0.30, 0.89 | 0.58                | 0.30, 1.13 | 0.01                                   |                                                |
| <b>MSI status</b>            |                |          |                     |            |                     |            |                       |            |                       |            |                     |            |                                        |                                                |
| MSS                          |                |          |                     |            |                     |            |                       |            |                       |            |                     |            |                                        |                                                |
| N                            |                | 40       |                     | 15         |                     | 26         |                       | 35         |                       | 78         |                     | 34         |                                        |                                                |
| Age-adjusted                 | 1              | Referent | 0.85                | 0.47, 1.54 | 1.29                | 0.78, 2.12 | 0.84                  | 0.53, 1.33 | 0.90                  | 0.61, 1.33 | 0.84                | 0.52, 1.37 | 0.22                                   |                                                |
| Multivariate <sup>d</sup>    | 1              | Referent | 0.86                | 0.47, 1.56 | 1.31                | 0.79, 2.16 | 0.86                  | 0.54, 1.36 | 0.90                  | 0.61, 1.33 | 0.86                | 0.53, 1.40 | 0.31                                   | 0.17                                           |
| MSI-high                     |                |          |                     |            |                     |            |                       |            |                       |            |                     |            |                                        |                                                |
| N                            |                | 22       |                     | 16         |                     | 13         |                       | 17         |                       | 28         |                     | 16         |                                        |                                                |
| Age-adjusted                 | 1              | Referent | 1.62                | 0.85, 3.11 | 1.12                | 0.56, 2.24 | 0.69                  | 0.37, 1.32 | 0.59                  | 0.33, 1.04 | 0.71                | 0.36, 1.40 | 0.01                                   |                                                |
| Multivariate <sup>d</sup>    | 1              | Referent | 1.66                | 0.86, 3.17 | 1.13                | 0.56, 2.25 | 0.71                  | 0.37, 1.34 | 0.59                  | 0.33, 1.05 | 0.72                | 0.37, 1.43 | 0.02                                   |                                                |
| <b>BRAF mutation status</b>  |                |          |                     |            |                     |            |                       |            |                       |            |                     |            |                                        |                                                |
| <i>BRAF</i> -wildtype        |                |          |                     |            |                     |            |                       |            |                       |            |                     |            |                                        |                                                |
| N                            |                | 45       |                     | 18         |                     | 26         |                       | 37         |                       | 86         |                     | 38         |                                        |                                                |
| Age-adjusted                 | 1              | Referent | 0.90                | 0.52, 1.56 | 1.12                | 0.69, 1.83 | 0.76                  | 0.49, 1.18 | 0.85                  | 0.59, 1.23 | 0.79                | 0.50, 1.26 | 0.24                                   |                                                |
| Multivariate <sup>d</sup>    | 1              | Referent | 0.91                | 0.53, 1.59 | 1.15                | 0.71, 1.88 | 0.78                  | 0.50, 1.21 | 0.86                  | 0.59, 1.25 | 0.82                | 0.51, 1.29 | 0.34                                   | 0.09                                           |
| <i>BRAF</i> -mutated         |                |          |                     |            |                     |            |                       |            |                       |            |                     |            |                                        |                                                |
| N                            |                | 17       |                     | 13         |                     | 13         |                       | 16         |                       | 22         |                     | 12         |                                        |                                                |
| Age-adjusted                 | 1              | Referent | 1.73                | 0.84, 3.58 | 1.51                | 0.73, 3.12 | 0.92                  | 0.46, 1.84 | 0.66                  | 0.34, 1.25 | 0.80                | 0.37, 1.73 | 0.01                                   |                                                |
| Multivariate <sup>d</sup>    | 1              | Referent | 1.75                | 0.85, 3.63 | 1.50                | 0.72, 3.10 | 0.94                  | 0.47, 1.88 | 0.66                  | 0.34, 1.25 | 0.80                | 0.37, 1.74 | 0.01                                   |                                                |

**DNMT3B expression status**

## DNMT3B-negative

|                           |   |          |      |            |      |            |      |            |      |            |      |            |      |      |
|---------------------------|---|----------|------|------------|------|------------|------|------------|------|------------|------|------------|------|------|
| N                         |   | 29       |      | 16         |      | 13         |      | 24         |      | 47         |      | 14         |      |      |
| Age-adjusted              | 1 | Referent | 1.34 | 0.72, 2.48 | 0.95 | 0.49, 1.83 | 0.94 | 0.54, 1.63 | 0.96 | 0.60, 1.55 | 0.82 | 0.42, 1.61 | 0.42 |      |
| Multivariate <sup>d</sup> | 1 | Referent | 1.32 | 0.71, 2.44 | 0.96 | 0.49, 1.85 | 0.97 | 0.56, 1.68 | 0.98 | 0.60, 1.57 | 0.85 | 0.43, 1.67 | 0.55 | 0.08 |

## DNMT3B-positive

|                           |   |          |      |            |      |            |      |            |      |            |      |            |      |  |
|---------------------------|---|----------|------|------------|------|------------|------|------------|------|------------|------|------------|------|--|
| N                         |   | 9        |      | 5          |      | 4          |      | 2          |      | 11         |      | 3          |      |  |
| Age-adjusted              | 1 | Referent | 1.41 | 0.47, 4.23 | 0.86 | 0.26, 2.82 | 0.24 | 0.05, 1.10 | 0.59 | 0.24, 1.44 | 0.37 | 0.10, 1.45 | 0.02 |  |
| Multivariate <sup>d</sup> | 1 | Referent | 1.45 | 0.48, 4.38 | 0.89 | 0.27, 2.92 | 0.25 | 0.05, 1.17 | 0.62 | 0.25, 1.52 | 0.38 | 0.10, 1.49 | 0.03 |  |

**Distal colorectal cancer****CIMP status**

## CIMP-low/negative

|                           |   |          |      |            |      |            |      |            |      |            |      |            |      |      |
|---------------------------|---|----------|------|------------|------|------------|------|------------|------|------------|------|------------|------|------|
| N                         |   | 69       |      | 26         |      | 40         |      | 68         |      | 115        |      | 42         |      |      |
| Age-adjusted              | 1 | Referent | 0.83 | 0.53, 1.31 | 1.29 | 0.87, 1.91 | 1.08 | 0.77, 1.51 | 0.90 | 0.66, 1.22 | 0.89 | 0.59, 1.35 | 0.18 |      |
| Multivariate <sup>d</sup> | 1 | Referent | 0.84 | 0.53, 1.32 | 1.27 | 0.86, 1.89 | 1.06 | 0.75, 1.49 | 0.91 | 0.67, 1.24 | 0.91 | 0.60, 1.38 | 0.21 | 0.44 |

## CIMP-high

|                           |   |          |   |   |      |            |   |   |      |            |      |            |      |  |
|---------------------------|---|----------|---|---|------|------------|---|---|------|------------|------|------------|------|--|
| N                         |   | 4        |   | 0 |      | 2          |   | 0 |      | 7          |      | 1          |      |  |
| Age-adjusted              | 1 | Referent | - | - | 0.82 | 0.15, 4.52 | - | - | 0.59 | 0.16, 2.10 | 0.19 | 0.02, 1.80 | 0.30 |  |
| Multivariate <sup>d</sup> | 1 | Referent | - | - | 0.80 | 0.14, 4.45 | - | - | 0.60 | 0.17, 2.16 | 0.19 | 0.02, 1.84 | 0.30 |  |

**MSI status**

## MSS

|                           |   |          |      |            |      |            |      |            |      |            |      |            |      |      |
|---------------------------|---|----------|------|------------|------|------------|------|------------|------|------------|------|------------|------|------|
| N                         |   | 67       |      | 25         |      | 41         |      | 66         |      | 119        |      | 50         |      |      |
| Age-adjusted              | 1 | Referent | 0.83 | 0.52, 1.32 | 1.37 | 0.92, 2.02 | 1.07 | 0.76, 1.52 | 0.94 | 0.69, 1.29 | 1.05 | 0.71, 1.55 | 0.52 |      |
| Multivariate <sup>d</sup> | 1 | Referent | 0.84 | 0.53, 1.33 | 1.35 | 0.91, 1.99 | 1.05 | 0.74, 1.49 | 0.95 | 0.70, 1.30 | 1.06 | 0.71, 1.58 | 0.55 | 0.02 |

## MSI-high

|                           |   |          |   |   |      |            |      |            |      |            |      |            |      |  |
|---------------------------|---|----------|---|---|------|------------|------|------------|------|------------|------|------------|------|--|
| N                         |   | 5        |   | 0 |      | 1          |      | 3          |      | 2          |      | 1          |      |  |
| Age-adjusted              | 1 | Referent | - | - | 0.34 | 0.04, 2.90 | 0.53 | 0.12, 2.28 | 0.14 | 0.03, 0.72 | 0.14 | 0.02, 1.33 | 0.02 |  |
| Multivariate <sup>d</sup> | 1 | Referent | - | - | 0.32 | 0.04, 2.76 | 0.54 | 0.13, 2.30 | 0.14 | 0.03, 0.73 | 0.15 | 0.02, 1.40 | 0.02 |  |

**BRAF mutation status***BRAF*-wildtype

|                           |   |          |      |            |      |            |      |            |      |            |      |            |      |      |
|---------------------------|---|----------|------|------------|------|------------|------|------------|------|------------|------|------------|------|------|
| N                         |   | 69       |      | 24         |      | 43         |      | 68         |      | 117        |      | 50         |      |      |
| Age-adjusted              | 1 | Referent | 0.76 | 0.48, 1.22 | 1.37 | 0.93, 2.01 | 1.05 | 0.75, 1.48 | 0.87 | 0.64, 1.18 | 0.95 | 0.64, 1.40 | 0.22 |      |
| Multivariate <sup>d</sup> | 1 | Referent | 0.76 | 0.48, 1.22 | 1.34 | 0.91, 1.97 | 1.03 | 0.73, 1.44 | 0.87 | 0.64, 1.18 | 0.96 | 0.65, 1.42 | 0.24 | 0.66 |

---

|                           |   |          |      |            |   |   |      |            |      |            |   |   |      |  |
|---------------------------|---|----------|------|------------|---|---|------|------------|------|------------|---|---|------|--|
| N                         |   | 4        |      | 1          |   | 0 |      | 3          |      | 8          |   | 0 |      |  |
| Age-adjusted              | 1 | Referent | 0.65 | 0.07, 5.95 | - | - | 0.92 | 0.20, 4.27 | 1.35 | 0.39, 4.65 | - | - | 0.80 |  |
| Multivariate <sup>d</sup> | 1 | Referent | 0.67 | 0.07, 6.15 | - | - | 0.94 | 0.20, 4.41 | 1.37 | 0.39, 4.75 | - | - | 0.84 |  |

**DNMT3B expression status**

## DNMT3B-negative

|                           |   |          |      |            |      |            |      |            |      |            |      |            |      |      |
|---------------------------|---|----------|------|------------|------|------------|------|------------|------|------------|------|------------|------|------|
| N                         |   | 44       |      | 19         |      | 24         |      | 48         |      | 75         |      | 21         |      |      |
| Age-adjusted              | 1 | Referent | 0.96 | 0.56, 1.65 | 1.25 | 0.76, 2.06 | 1.33 | 0.88, 2.02 | 1.05 | 0.71, 1.54 | 1.00 | 0.58, 1.75 | 0.54 |      |
| Multivariate <sup>d</sup> | 1 | Referent | 0.96 | 0.56, 1.66 | 1.25 | 0.75, 2.06 | 1.32 | 0.87, 2.01 | 1.07 | 0.72, 1.57 | 1.03 | 0.59, 1.80 | 0.67 | 0.27 |

---

## DNMT3B-positive

|                           |   |          |   |   |      |            |      |            |      |            |      |            |      |  |
|---------------------------|---|----------|---|---|------|------------|------|------------|------|------------|------|------------|------|--|
| N                         |   | 8        |   | 0 |      | 4          |      | 3          |      | 5          |      | 2          |      |  |
| Age-adjusted              | 1 | Referent | - | - | 1.21 | 0.36, 4.06 | 0.42 | 0.11, 1.62 | 0.39 | 0.12, 1.21 | 0.61 | 0.12, 3.08 | 0.19 |  |
| Multivariate <sup>d</sup> | 1 | Referent | - | - | 1.18 | 0.35, 4.01 | 0.43 | 0.11, 1.65 | 0.40 | 0.13, 1.25 | 0.62 | 0.12, 3.16 | 0.20 |  |

Abbreviations: CI, confidence interval; CIMP, CpG island methylator phenotype; DNMT3B, DNA methyltransferase 3B; HR, hazard ratio; MSI, microsatellite instability; MSS, microsatellite stable; N, No. of cases.

<sup>a</sup> All models were stratified with age and sex.

<sup>b</sup> Based on the linear trend test across the median values in each category. To test whether duration of smoking cessation reduced the cancer risk compared with current smoking, trend test and heterogeneity test were performed on current and past smokers excluding never smokers.

<sup>c</sup> Tests for heterogeneity (for a multivariate HR linear trend) showed significance of differential association of cessation with colorectal cancer risk by molecular subtypes. (i.e., CIMP-low/negative vs. CIMP-high; MSS vs. MSI-high; *BRAF*-wildtype vs. *BRAF*-mutated; DNMT3B-negative vs. DNMT3B-positive).

<sup>d</sup> Models were adjusted for body mass index, family history of colorectal cancer in any first-degree relative, regular use of aspirin, physical activity level, alcohol consumption, total caloric intake and red meat intake.

Web Table 4. Duration of Smoking Cessation and Incident Colorectal Cancer Risk by Molecular Subtypes<sup>a</sup> in the Nurses' Health Study (1980-2008) and the Health Professionals Follow-up Study (1986-2008)

|                              | Never smoker |           | Cessation<br>≥40 years |            | Cessation<br>39-20 years |            | Cessation<br>19-10 years |            | Cessation<br>9-5 years |            | Cessation<br>4-1 years |            | Current<br>smoker |            | $P_{\text{trend}}^b$<br>( $P_{\text{heterogeneity}}^c$ ) |
|------------------------------|--------------|-----------|------------------------|------------|--------------------------|------------|--------------------------|------------|------------------------|------------|------------------------|------------|-------------------|------------|----------------------------------------------------------|
|                              | HR           |           | HR                     | 95% CI     | HR                       | 95% CI     | HR                       | 95% CI     | HR                     | 95% CI     | HR                     | 95% CI     | HR                | 95% CI     |                                                          |
| Person-years                 |              | 1,383,154 |                        | 126,688    |                          | 511,426    |                          | 312,757    |                        | 155,720    |                        | 161,905    |                   | 439,508    |                                                          |
| <b>All colorectal cancer</b> |              |           |                        |            |                          |            |                          |            |                        |            |                        |            |                   |            |                                                          |
| N                            |              | 490       |                        | 105        |                          | 242        |                          | 129        |                        | 86         |                        | 60         |                   | 139        |                                                          |
| Age-adjusted                 | 1            | Referent  | 1.26                   | 1.01, 1.56 | 1.13                     | 0.97, 1.32 | 1.18                     | 0.97, 1.44 | 1.61                   | 1.28, 2.03 | 1.21                   | 0.92, 1.58 | 1.23              | 1.02, 1.49 | 0.19                                                     |
| Multivariate <sup>d</sup>    | 1            | Referent  | 1.23                   | 0.99, 1.54 | 1.08                     | 0.93, 1.27 | 1.13                     | 0.93, 1.38 | 1.54                   | 1.22, 1.94 | 1.16                   | 0.88, 1.53 | 1.18              | 0.97, 1.43 | 0.29                                                     |
| <b>CIMP status</b>           |              |           |                        |            |                          |            |                          |            |                        |            |                        |            |                   |            |                                                          |
| (0.02)                       |              |           |                        |            |                          |            |                          |            |                        |            |                        |            |                   |            |                                                          |
| CIMP-low/negative            |              |           |                        |            |                          |            |                          |            |                        |            |                        |            |                   |            |                                                          |
| N                            |              | 377       |                        | 72         |                          | 194        |                          | 105        |                        | 66         |                        | 42         |                   | 103        |                                                          |
| Age-adjusted                 | 1            | Referent  | 1.10                   | 0.84, 1.43 | 1.15                     | 0.96, 1.37 | 1.26                     | 1.01, 1.57 | 1.61                   | 1.24, 2.10 | 1.07                   | 0.78, 1.48 | 1.18              | 0.94, 1.47 | 0.17                                                     |
| Multivariate <sup>d</sup>    | 1            | Referent  | 1.08                   | 0.83, 1.41 | 1.11                     | 0.93, 1.33 | 1.22                     | 0.97, 1.52 | 1.56                   | 1.19, 2.03 | 1.04                   | 0.75, 1.44 | 1.13              | 0.90, 1.42 | 0.25                                                     |
| CIMP-high                    |              |           |                        |            |                          |            |                          |            |                        |            |                        |            |                   |            |                                                          |
| N                            |              | 71        |                        | 16         |                          | 37         |                          | 18         |                        | 15         |                        | 15         |                   | 31         |                                                          |
| Age-adjusted                 | 1            | Referent  | 1.07                   | 0.61, 1.86 | 1.15                     | 0.77, 1.72 | 1.15                     | 0.68, 1.93 | 1.98                   | 1.13, 3.47 | 2.41                   | 1.37, 4.24 | 2.22              | 1.44, 3.41 | 0.001                                                    |
| Multivariate <sup>d</sup>    | 1            | Referent  | 1.06                   | 0.61, 1.85 | 1.11                     | 0.74, 1.66 | 1.12                     | 0.66, 1.88 | 1.90                   | 1.08, 3.33 | 2.37                   | 1.35, 4.17 | 2.12              | 1.37, 3.27 | 0.001                                                    |
| <b>MSI status</b>            |              |           |                        |            |                          |            |                          |            |                        |            |                        |            |                   |            |                                                          |
| (0.02)                       |              |           |                        |            |                          |            |                          |            |                        |            |                        |            |                   |            |                                                          |
| MSS                          |              |           |                        |            |                          |            |                          |            |                        |            |                        |            |                   |            |                                                          |
| N                            |              | 400       |                        | 86         |                          | 201        |                          | 101        |                        | 68         |                        | 40         |                   | 108        |                                                          |
| Age-adjusted                 | 1            | Referent  | 1.14                   | 0.89, 1.46 | 1.11                     | 0.93, 1.32 | 1.15                     | 0.92, 1.43 | 1.59                   | 1.23, 2.06 | 0.98                   | 0.71, 1.36 | 1.19              | 0.96, 1.48 | 0.26                                                     |
| Multivariate <sup>d</sup>    | 1            | Referent  | 1.12                   | 0.88, 1.44 | 1.08                     | 0.90, 1.28 | 1.11                     | 0.89, 1.38 | 1.53                   | 1.18, 1.99 | 0.96                   | 0.69, 1.33 | 1.15              | 0.92, 1.43 | 0.36                                                     |
| MSI-high                     |              |           |                        |            |                          |            |                          |            |                        |            |                        |            |                   |            |                                                          |
| N                            |              | 63        |                        | 17         |                          | 30         |                          | 20         |                        | 14         |                        | 16         |                   | 27         |                                                          |
| Age-adjusted                 | 1            | Referent  | 1.30                   | 0.75, 2.27 | 1.09                     | 0.70, 1.68 | 1.45                     | 0.87, 2.41 | 2.13                   | 1.18, 3.81 | 2.78                   | 1.60, 4.84 | 2.19              | 1.38, 3.47 | 0.001                                                    |
| Multivariate <sup>d</sup>    | 1            | Referent  | 1.29                   | 0.74, 2.25 | 1.05                     | 0.68, 1.63 | 1.40                     | 0.84, 2.33 | 2.02                   | 1.12, 3.62 | 2.71                   | 1.55, 4.72 | 2.10              | 1.32, 3.33 | 0.002                                                    |

| <b><i>BRAF</i> mutation status</b> |   |          |      |            |      |            |      |            |      |            |      |            |      |            |      |  | (0.10) |
|------------------------------------|---|----------|------|------------|------|------------|------|------------|------|------------|------|------------|------|------------|------|--|--------|
| <i>BRAF</i> -wildtype              |   |          |      |            |      |            |      |            |      |            |      |            |      |            |      |  |        |
| N                                  |   |          | 404  |            | 89   |            | 207  |            | 105  |            | 70   |            | 42   |            | 114  |  |        |
| Age-adjusted                       | 1 | Referent | 1.14 | 0.89, 1.45 | 1.12 | 0.95, 1.33 | 1.19 | 0.96, 1.48 | 1.64 | 1.27, 2.12 | 1.04 | 0.76, 1.43 | 1.28 | 1.04, 1.58 | 0.12 |  |        |
| Multivariate <sup>d</sup>          | 1 | Referent | 1.12 | 0.88, 1.43 | 1.09 | 0.92, 1.29 | 1.14 | 0.92, 1.42 | 1.58 | 1.22, 2.05 | 1.01 | 0.73, 1.40 | 1.23 | 0.99, 1.53 | 0.18 |  |        |
| <i>BRAF</i> -mutated               |   |          |      |            |      |            |      |            |      |            |      |            |      |            |      |  |        |
| N                                  |   |          | 67   |            | 13   |            | 30   |            | 19   |            | 13   |            | 14   |            | 22   |  |        |
| Age-adjusted                       | 1 | Referent | 1.10 | 0.60, 2.03 | 1.05 | 0.68, 1.63 | 1.26 | 0.76, 2.11 | 1.72 | 0.94, 3.13 | 2.12 | 1.18, 3.80 | 1.45 | 0.88, 2.36 | 0.02 |  |        |
| Multivariate <sup>d</sup>          | 1 | Referent | 1.09 | 0.59, 2.01 | 1.02 | 0.66, 1.58 | 1.23 | 0.74, 2.06 | 1.64 | 0.90, 2.99 | 2.08 | 1.16, 3.72 | 1.40 | 0.86, 2.30 | 0.02 |  |        |

| <b>DNMT3B expression status</b> |   |          |      |            |      |            |      |            |      |            |      |            |      |            |      |  | (0.03) |
|---------------------------------|---|----------|------|------------|------|------------|------|------------|------|------------|------|------------|------|------------|------|--|--------|
| DNMT3B-negative                 |   |          |      |            |      |            |      |            |      |            |      |            |      |            |      |  |        |
| N                               |   |          | 238  |            | 37   |            | 123  |            | 72   |            | 38   |            | 35   |            | 73   |  |        |
| Age-adjusted                    | 1 | Referent | 1.12 | 0.78, 1.61 | 1.18 | 0.95, 1.48 | 1.36 | 1.04, 1.77 | 1.33 | 0.94, 1.88 | 1.28 | 0.89, 1.83 | 1.16 | 0.89, 1.52 | 0.40 |  |        |
| Multivariate <sup>d</sup>       | 1 | Referent | 1.12 | 0.77, 1.61 | 1.16 | 0.92, 1.45 | 1.31 | 1.00, 1.72 | 1.28 | 0.90, 1.81 | 1.23 | 0.86, 1.76 | 1.11 | 0.84, 1.46 | 0.61 |  |        |
| DNMT3B-positive                 |   |          |      |            |      |            |      |            |      |            |      |            |      |            |      |  |        |
| N                               |   |          | 52   |            | 5    |            | 16   |            | 5    |            | 8    |            | 5    |            | 17   |  |        |
| Age-adjusted                    | 1 | Referent | 0.57 | 0.22, 1.47 | 0.66 | 0.37, 1.16 | 0.42 | 0.17, 1.06 | 1.31 | 0.61, 2.78 | 1.00 | 0.40, 2.51 | 1.32 | 0.75, 2.30 | 0.01 |  |        |
| Multivariate <sup>d</sup>       | 1 | Referent | 0.54 | 0.21, 1.40 | 0.64 | 0.36, 1.14 | 0.40 | 0.16, 1.02 | 1.23 | 0.58, 2.62 | 0.96 | 0.38, 2.41 | 1.23 | 0.70, 2.16 | 0.01 |  |        |

Abbreviations: CI, confidence interval; CIMP, CpG island methylator phenotype; DNMT3B, DNA methyltransferase 3B; HR, hazard ratio; MSI, microsatellite instability; MSS, microsatellite stable; N, No. of cases.

<sup>a</sup> All models were stratified with age and sex.

<sup>b</sup> Based on the linear trend test across the median values in each category. To test whether duration of smoking cessation reduced the cancer risk compared with current smoking, trend test and heterogeneity test were performed on current and past smokers excluding never smokers.

<sup>c</sup> Tests for heterogeneity (for a multivariate HR liner trend) showed significance of differential association of cessation with colorectal cancer risk by molecular subtypes. (i.e., CIMP-low/negative vs. CIMP-high; MSS vs. MSI-high; *BRAF*-wildtype vs. *BRAF*-mutated; DNMT3B-negative vs. DNMT3B-positive).

<sup>d</sup> Models were adjusted for body mass index, family history of colorectal cancer in any first-degree relative, regular use of aspirin, physical activity level, alcohol consumption, total caloric intake and red meat intake.

Web Table 5. Duration of Smoking Cessation and Colorectal Cancer Risk by Molecular Subtypes in Strata of Cumulative Pack-years Smoked<sup>a</sup> in the Nurses' Health Study (1980-2008) and the Health Professionals Follow-up Study (1986-2008)

|                              | Pack-years $\geq$ 20 |          |                     |            |                           |            |                                                          | Pack-years<20  |          |                     |            |                           |            |                                                          |        |
|------------------------------|----------------------|----------|---------------------|------------|---------------------------|------------|----------------------------------------------------------|----------------|----------|---------------------|------------|---------------------------|------------|----------------------------------------------------------|--------|
|                              | Current smoker       |          | Cessation <10 years |            | Cessation $\geq$ 10 years |            | $P_{\text{trend}}^b$<br>( $P_{\text{heterogeneity}}^c$ ) | Current smoker |          | Cessation <10 years |            | Cessation $\geq$ 10 years |            | $P_{\text{trend}}^b$<br>( $P_{\text{heterogeneity}}^c$ ) |        |
|                              | HR                   |          | HR                  | 95% CI     | HR                        | 95% CI     |                                                          | HR             | 95% CI   | HR                  | 95% CI     | HR                        | 95% CI     |                                                          |        |
| Person-years                 |                      | 339,425  |                     | 187,701    |                           | 302,071    |                                                          |                | 87,434   |                     | 117,251    |                           | 623,562    |                                                          |        |
| <b>All colorectal cancer</b> |                      |          |                     |            |                           |            |                                                          |                |          |                     |            |                           |            |                                                          |        |
| N                            |                      | 113      |                     | 107        |                           | 214        |                                                          |                | 18       |                     | 29         |                           | 250        |                                                          |        |
| Age-adjusted                 | 1                    | Referent | 1.23                | 0.94, 1.61 | 1.10                      | 0.87, 1.40 | 0.87                                                     | 1              | Referent | 0.90                | 0.50, 1.63 | 0.89                      | 0.54, 1.44 | 0.49                                                     |        |
| Multivariate <sup>d</sup>    | 1                    | Referent | 1.22                | 0.94, 1.60 | 1.09                      | 0.86, 1.38 | 0.91                                                     | 1              | Referent | 0.90                | 0.50, 1.63 | 0.88                      | 0.54, 1.44 | 0.50                                                     |        |
| <b>CIMP status</b>           |                      |          |                     |            |                           |            | (0.02)                                                   |                |          |                     |            |                           |            |                                                          | (0.07) |
| CIMP-low/negative            |                      |          |                     |            |                           |            |                                                          |                |          |                     |            |                           |            |                                                          |        |
| N                            |                      | 81       |                     | 76         |                           | 161        |                                                          |                | 16       |                     | 25         |                           | 202        |                                                          |        |
| Age-adjusted                 | 1                    | Referent | 1.25                | 0.91, 1.72 | 1.13                      | 0.85, 1.49 | 0.67                                                     | 1              | Referent | 0.90                | 0.48, 1.71 | 0.88                      | 0.52, 1.48 | 0.38                                                     |        |
| Multivariate <sup>d</sup>    | 1                    | Referent | 1.24                | 0.90, 1.71 | 1.12                      | 0.84, 1.49 | 0.69                                                     | 1              | Referent | 0.90                | 0.47, 1.70 | 0.87                      | 0.52, 1.47 | 0.35                                                     |        |
| CIMP-high                    |                      |          |                     |            |                           |            |                                                          |                |          |                     |            |                           |            |                                                          |        |
| N                            |                      | 29       |                     | 27         |                           | 36         |                                                          |                | 0        |                     | 1          |                           | 32         |                                                          |        |
| Age-adjusted                 | 1                    | Referent | 1.09                | 0.64, 1.86 | 0.58                      | 0.35, 0.97 | 0.02                                                     | 1              | Referent | -                   | -          | -                         | -          | 0.21                                                     |        |
| Multivariate <sup>d</sup>    | 1                    | Referent | 1.09                | 0.64, 1.85 | 0.57                      | 0.34, 0.96 | 0.02                                                     | 1              | Referent | -                   | -          | -                         | -          | 0.20                                                     |        |
| <b>MSI status</b>            |                      |          |                     |            |                           |            | (0.12)                                                   |                |          |                     |            |                           |            |                                                          | (0.37) |
| MSS                          |                      |          |                     |            |                           |            |                                                          |                |          |                     |            |                           |            |                                                          |        |
| N                            |                      | 84       |                     | 74         |                           | 168        |                                                          |                | 17       |                     | 25         |                           | 209        |                                                          |        |
| Age-adjusted                 | 1                    | Referent | 1.17                | 0.85, 1.61 | 1.06                      | 0.81, 1.40 | 0.88                                                     | 1              | Referent | 0.81                | 0.43, 1.51 | 0.80                      | 0.48, 1.33 | 0.24                                                     |        |
| Multivariate <sup>d</sup>    | 1                    | Referent | 1.16                | 0.84, 1.59 | 1.05                      | 0.79, 1.39 | 0.95                                                     | 1              | Referent | 0.81                | 0.43, 1.51 | 0.79                      | 0.48, 1.32 | 0.20                                                     |        |
| MSI-high                     |                      |          |                     |            |                           |            |                                                          |                |          |                     |            |                           |            |                                                          |        |
| N                            |                      | 25       |                     | 27         |                           | 35         |                                                          |                | 1        |                     | 2          |                           | 31         |                                                          |        |
| Age-adjusted                 | 1                    | Referent | 1.26                | 0.73, 2.19 | 0.69                      | 0.41, 1.18 | 0.07                                                     | 1              | Referent | 0.92                | 0.08, 10.3 | 1.35                      | 0.18, 10.2 | 0.63                                                     |        |
| Multivariate <sup>d</sup>    | 1                    | Referent | 1.25                | 0.72, 2.17 | 0.69                      | 0.40, 1.18 | 0.08                                                     | 1              | Referent | 0.91                | 0.08, 10.3 | 1.35                      | 0.18, 10.1 | 0.60                                                     |        |

| <b><i>BRAF</i> mutation status</b> |   | (0.57)   |      |            |      |            |      |    | (0.07)   |      |            |      |            |      |  |
|------------------------------------|---|----------|------|------------|------|------------|------|----|----------|------|------------|------|------------|------|--|
| <i>BRAF</i> -wildtype              |   |          |      |            |      |            |      |    |          |      |            |      |            |      |  |
| N                                  |   | 89       |      | 78         |      | 176        |      | 18 |          | 25   |            | 215  |            |      |  |
| Age-adjusted                       | 1 | Referent | 1.14 | 0.84, 1.56 | 0.99 | 0.76, 1.30 | 0.75 | 1  | Referent | 0.76 | 0.41, 1.40 | 0.76 | 0.46, 1.24 | 0.16 |  |
| Multivariate <sup>d</sup>          | 1 | Referent | 1.14 | 0.83, 1.55 | 0.98 | 0.75, 1.29 | 0.71 | 1  | Referent | 0.76 | 0.41, 1.41 | 0.75 | 0.46, 1.23 | 0.14 |  |
| <i>BRAF</i> -mutated               |   |          |      |            |      |            |      |    |          |      |            |      |            |      |  |
| N                                  |   | 21       |      | 24         |      | 31         |      | 0  |          | 2    |            | 29   |            |      |  |
| Age-adjusted                       | 1 | Referent | 1.46 | 0.81, 2.65 | 0.96 | 0.54, 1.71 | 0.42 | 1  | Referent | -    | -          | -    | -          | 0.20 |  |
| Multivariate <sup>d</sup>          | 1 | Referent | 1.44 | 0.80, 2.60 | 0.94 | 0.53, 1.67 | 0.41 | 1  | Referent | -    | -          | -    | -          | 0.22 |  |
| <b>DNMT3B expression status</b>    |   | (0.03)   |      |            |      |            |      |    | (0.74)   |      |            |      |            |      |  |
| DNMT3B-negative                    |   |          |      |            |      |            |      |    |          |      |            |      |            |      |  |
| N                                  |   | 59       |      | 50         |      | 97         |      | 13 |          | 17   |            | 129  |            |      |  |
| Age-adjusted                       | 1 | Referent | 1.17 | 0.80, 1.71 | 1.16 | 0.83, 1.64 | 0.46 | 1  | Referent | 0.74 | 0.36, 1.55 | 0.83 | 0.46, 1.48 | 0.50 |  |
| Multivariate <sup>d</sup>          | 1 | Referent | 1.15 | 0.78, 1.68 | 1.17 | 0.83, 1.65 | 0.45 | 1  | Referent | 0.75 | 0.36, 1.56 | 0.82 | 0.46, 1.48 | 0.49 |  |
| DNMT3B-positive                    |   |          |      |            |      |            |      |    |          |      |            |      |            |      |  |
| N                                  |   | 14       |      | 11         |      | 14         |      | 1  |          | 2    |            | 12   |            |      |  |
| Age-adjusted                       | 1 | Referent | 1.09 | 0.49, 2.42 | 0.59 | 0.27, 1.28 | 0.04 | 1  | Referent | 1.05 | 0.09, 11.7 | 0.77 | 0.10, 6.05 | 0.59 |  |
| Multivariate <sup>d</sup>          | 1 | Referent | 1.09 | 0.49, 2.44 | 0.59 | 0.27, 1.27 | 0.04 | 1  | Referent | 1.02 | 0.09, 11.3 | 0.75 | 0.10, 5.89 | 0.56 |  |

CI, confidence interval; CIMP, CpG island methylator phenotype; DNMT3B, DNA methyltransferase 3B; HR, hazard ratio; MSI, microsatellite instability; MSS, microsatellite stable; N, No. of cases.

<sup>a</sup> All models were stratified with age and sex.

<sup>b</sup> Based on the liner trend test by using the median value of each category. To test whether duration of smoking cessation reduced the cancer risk compared with current smoking, trend test and heterogeneity test were performed on current and past smokers excluding never smokers.

<sup>c</sup> Tests for heterogeneity (for a multivariate HR linear trend) showed significance of association of cessation with colorectal cancer risk by molecular subtypes.

<sup>d</sup> Models were adjusted for body mass index, family history of colorectal cancer in any first-degree relative, regular use of aspirin, physical activity level, alcohol consumption, total calorie intake and red meat intake.

Web Table 6. Smoking Status, Cumulative Pack-years and Incident Colorectal Cancer Risk by Molecular Subtypes<sup>a</sup> in the Nurses' Health Study (1980-2008) or the Health Professionals Follow-up Study (1986-2008)

|                              | Never     | Smoking status |         |            |         |                                                          |        | Cumulative pack-years |            |         |            |         |                                                          |         |
|------------------------------|-----------|----------------|---------|------------|---------|----------------------------------------------------------|--------|-----------------------|------------|---------|------------|---------|----------------------------------------------------------|---------|
|                              |           | Former         |         | Current    |         | $P_{\text{trend}}^b$<br>( $P_{\text{heterogeneity}}^c$ ) | 1-19   |                       | 20-39      |         | ≥40        |         | $P_{\text{trend}}^b$<br>( $P_{\text{heterogeneity}}^c$ ) |         |
|                              |           | HR             | 95% CI  | HR         | 95% CI  |                                                          | HR     | 95% CI                | HR         | 95% CI  | HR         | 95% CI  |                                                          |         |
| <b>Women</b>                 |           |                |         |            |         |                                                          |        |                       |            |         |            |         |                                                          |         |
| Person-years                 | 1,012,758 |                | 890,018 |            | 381,181 |                                                          |        | 637,996               |            | 356,668 |            | 249,213 |                                                          |         |
| <b>All colorectal cancer</b> |           |                |         |            |         |                                                          |        |                       |            |         |            |         |                                                          |         |
| N                            | 285       |                | 332     |            | 101     |                                                          |        | 171                   |            | 119     |            | 129     |                                                          |         |
| Age-adjusted                 | 1         | Referent       | 1.23    | 1.05, 1.44 | 1.26    | 1.00, 1.58                                               | 0.01   | 1.06                  | 0.87, 1.28 | 1.27    | 1.03, 1.58 | 1.46    | 1.18, 1.80                                               | 0.0001  |
| Multivariate <sup>d</sup>    | 1         | Referent       | 1.23    | 1.04, 1.45 | 1.26    | 0.99, 1.59                                               | 0.02   | 1.06                  | 0.87, 1.28 | 1.27    | 1.02, 1.59 | 1.46    | 1.17, 1.81                                               | 0.0002  |
| <b>CIMP status</b>           |           |                |         |            |         |                                                          | (0.08) |                       |            |         |            |         |                                                          | (0.01)  |
| CIMP-low/negative            |           |                |         |            |         |                                                          |        |                       |            |         |            |         |                                                          |         |
| N                            | 218       |                | 255     |            | 71      |                                                          |        | 141                   |            | 92      |            | 84      |                                                          |         |
| Age-adjusted                 | 1         | Referent       | 1.25    | 1.04, 1.50 | 1.10    | 0.83, 1.44                                               | 0.13   | 1.13                  | 0.91, 1.40 | 1.28    | 1.00, 1.63 | 1.26    | 0.98, 1.63                                               | 0.04    |
| Multivariate <sup>d</sup>    | 1         | Referent       | 1.25    | 1.04, 1.51 | 1.10    | 0.83, 1.45                                               | 0.14   | 1.14                  | 0.92, 1.41 | 1.28    | 1.00, 1.64 | 1.26    | 0.97, 1.63                                               | 0.05    |
| CIMP-high                    |           |                |         |            |         |                                                          |        |                       |            |         |            |         |                                                          |         |
| N                            | 53        |                | 65      |            | 25      |                                                          |        | 22                    |            | 24      |            | 39      |                                                          |         |
| Age-adjusted                 | 1         | Referent       | 1.22    | 0.85, 1.76 | 2.12    | 1.31, 3.43                                               | 0.01   | 0.75                  | 0.46, 1.24 | 1.43    | 0.88, 2.32 | 2.21    | 1.46, 3.34                                               | <0.0001 |
| Multivariate <sup>d</sup>    | 1         | Referent       | 1.23    | 0.85, 1.77 | 2.10    | 1.29, 3.42                                               | 0.01   | 0.76                  | 0.46, 1.25 | 1.43    | 0.88, 2.33 | 2.18    | 1.44, 3.32                                               | <0.0001 |
| <b>MSI status</b>            |           |                |         |            |         |                                                          | (0.18) |                       |            |         |            |         |                                                          | (0.02)  |
| MSS                          |           |                |         |            |         |                                                          |        |                       |            |         |            |         |                                                          |         |
| N                            | 223       |                | 255     |            | 76      |                                                          |        | 143                   |            | 89      |            | 88      |                                                          |         |
| Age-adjusted                 | 1         | Referent       | 1.22    | 1.01, 1.45 | 1.16    | 0.89, 1.51                                               | 0.08   | 1.12                  | 0.91, 1.38 | 1.20    | 0.94, 1.54 | 1.29    | 1.00, 1.65                                               | 0.04    |
| Multivariate <sup>d</sup>    | 1         | Referent       | 1.22    | 1.01, 1.47 | 1.16    | 0.89, 1.52                                               | 0.09   | 1.13                  | 0.91, 1.39 | 1.21    | 0.94, 1.55 | 1.28    | 0.99, 1.66                                               | 0.05    |
| MSI-high                     |           |                |         |            |         |                                                          |        |                       |            |         |            |         |                                                          |         |
| N                            | 48        |                | 59      |            | 21      |                                                          |        | 20                    |            | 23      |            | 34      |                                                          |         |
| Age-adjusted                 | 1         | Referent       | 1.25    | 0.85, 1.82 | 1.91    | 1.13, 3.22                                               | 0.02   | 0.76                  | 0.45, 1.29 | 1.53    | 0.93, 2.51 | 2.14    | 1.38, 3.33                                               | <0.0001 |
| Multivariate <sup>d</sup>    | 1         | Referent       | 1.24    | 0.85, 1.83 | 1.90    | 1.13, 3.22                                               | 0.02   | 0.77                  | 0.45, 1.29 | 1.52    | 0.92, 2.50 | 2.13    | 1.36, 3.33                                               | 0.0001  |



|                                 |   |          |      |            |      |            |      |         |            |         |            |        |            |        |  |
|---------------------------------|---|----------|------|------------|------|------------|------|---------|------------|---------|------------|--------|------------|--------|--|
| <b>BRAF mutation status</b>     |   | (0.94)   |      |            |      |            |      |         |            |         |            |        | (0.04)     |        |  |
| <i>BRAF</i> -wildtype           |   |          |      |            |      |            |      |         |            |         |            |        |            |        |  |
| N                               |   | 220      |      | 258        |      | 79         |      | 146     |            | 90      |            | 89     |            |        |  |
| Age-adjusted                    | 1 | Referent | 1.24 | 1.04, 1.49 | 1.25 | 0.96, 1.62 | 0.02 | 1.16    | 0.94, 1.43 | 1.23    | 0.96, 1.58 | 1.33   | 1.04, 1.71 | 0.02   |  |
| Multivariate <sup>d</sup>       | 1 | Referent | 1.24 | 1.03, 1.50 | 1.25 | 0.96, 1.63 | 0.03 | 1.16    | 0.94, 1.44 | 1.23    | 0.96, 1.58 | 1.33   | 1.03, 1.71 | 0.03   |  |
| <i>BRAF</i> -mutated            |   |          |      |            |      |            |      |         |            |         |            |        |            |        |  |
| N                               |   | 55       |      | 62         |      | 19         |      | 20      |            | 23      |            | 36     |            |        |  |
| Age-adjusted                    | 1 | Referent | 1.14 | 0.79, 1.64 | 1.37 | 0.81, 2.34 | 0.24 | 0.65    | 0.39, 1.09 | 1.31    | 0.81, 2.14 | 1.95   | 1.27, 2.98 | 0.0003 |  |
| Multivariate <sup>d</sup>       | 1 | Referent | 1.14 | 0.79, 1.65 | 1.36 | 0.80, 2.33 | 0.25 | 0.66    | 0.39, 1.10 | 1.31    | 0.80, 2.14 | 1.93   | 1.26, 2.97 | 0.0004 |  |
| <b>DNMT3B expression status</b> |   | (0.15)   |      |            |      |            |      |         |            |         |            |        | (0.17)     |        |  |
| DNMT3B-negative                 |   |          |      |            |      |            |      |         |            |         |            |        |            |        |  |
| N                               |   | 143      |      | 164        |      | 61         |      | 92      |            | 58      |            | 68     |            |        |  |
| Age-adjusted                    | 1 | Referent | 1.25 | 1.00, 1.57 | 1.28 | 0.94, 1.73 | 0.05 | 1.12    | 0.86, 1.46 | 1.18    | 0.87, 1.60 | 1.51   | 1.13, 2.02 | 0.01   |  |
| Multivariate <sup>d</sup>       | 1 | Referent | 1.26 | 1.00, 1.58 | 1.25 | 0.92, 1.71 | 0.07 | 1.13    | 0.87, 1.48 | 1.18    | 0.86, 1.61 | 1.48   | 1.09, 1.99 | 0.01   |  |
| DNMT3B-positive                 |   |          |      |            |      |            |      |         |            |         |            |        |            |        |  |
| N                               |   | 38       |      | 21         |      | 12         |      | 11      |            | 9       |            | 11     |            |        |  |
| Age-adjusted                    | 1 | Referent | 0.57 | 0.33, 0.97 | 1.07 | 0.55, 2.06 | 0.49 | 0.50    | 0.26, 0.99 | 0.72    | 0.35, 1.49 | 0.88   | 0.45, 1.72 | 0.75   |  |
| Multivariate <sup>d</sup>       | 1 | Referent | 0.57 | 0.33, 0.98 | 1.02 | 0.53, 1.99 | 0.44 | 0.51    | 0.26, 1.01 | 0.71    | 0.34, 1.49 | 0.84   | 0.43, 1.67 | 0.67   |  |
| <b>Men</b>                      |   |          |      |            |      |            |      |         |            |         |            |        |            |        |  |
| Person-years                    |   | 370,397  |      | 388,351    |      | 58,327     |      | 206,897 |            | 154,604 |            | 89,204 |            |        |  |
| <b>All colorectal cancer</b>    |   |          |      |            |      |            |      |         |            |         |            |        |            |        |  |
| N                               |   | 205      |      | 299        |      | 38         |      | 129     |            | 107     |            | 87     |            |        |  |
| Age-adjusted                    | 1 | Referent | 1.18 | 0.98, 1.41 | 1.31 | 0.92, 1.87 | 0.04 | 1.12    | 0.90, 1.40 | 1.08    | 0.85, 1.37 | 1.19   | 0.92, 1.54 | 0.24   |  |
| Multivariate <sup>d</sup>       | 1 | Referent | 1.08 | 0.90, 1.31 | 1.13 | 0.79, 1.62 | 0.36 | 1.06    | 0.84, 1.33 | 0.98    | 0.77, 1.25 | 1.04   | 0.80, 1.36 | 0.95   |  |
| <b>CIMP status</b>              |   | (0.24)   |      |            |      |            |      |         |            |         |            |        | (0.07)     |        |  |
| CIMP-low/negative               |   |          |      |            |      |            |      |         |            |         |            |        |            |        |  |
| N                               |   | 159      |      | 230        |      | 32         |      | 103     |            | 86      |            | 64     |            |        |  |
| Age-adjusted                    | 1 | Referent | 1.17 | 0.95, 1.44 | 1.39 | 0.95, 2.04 | 0.05 | 1.17    | 0.91, 1.51 | 1.12    | 0.86, 1.46 | 1.13   | 0.84, 1.51 | 0.47   |  |
| Multivariate <sup>d</sup>       | 1 | Referent | 1.08 | 0.87, 1.34 | 1.19 | 0.80, 1.76 | 0.33 | 1.10    | 0.85, 1.42 | 1.03    | 0.78, 1.35 | 0.98   | 0.72, 1.33 | 0.81   |  |
| CIMP-high                       |   |          |      |            |      |            |      |         |            |         |            |        |            |        |  |
| N                               |   | 18       |      | 38         |      | 6          |      | 12      |            | 12      |            | 17     |            |        |  |
| Age-adjusted                    | 1 | Referent | 1.64 | 0.93, 2.88 | 2.38 | 0.93, 6.09 | 0.04 | 1.23    | 0.59, 2.58 | 1.28    | 0.61, 2.67 | 2.31   | 1.18, 4.53 | 0.02   |  |
| Multivariate <sup>d</sup>       | 1 | Referent | 1.50 | 0.85, 2.64 | 1.93 | 0.74, 5.00 | 0.10 | 1.18    | 0.56, 2.46 | 1.11    | 0.53, 2.34 | 2.00   | 1.01, 3.95 | 0.06   |  |

| <b>MSI status</b>               |   | (0.04)   |      |            |      |            |      |      | (0.01)     |      |            |      |            |       |  |
|---------------------------------|---|----------|------|------------|------|------------|------|------|------------|------|------------|------|------------|-------|--|
| <b>MSS</b>                      |   |          |      |            |      |            |      |      |            |      |            |      |            |       |  |
| N                               |   | 177      |      | 249        |      | 32         |      | 111  |            | 86   |            | 71   |            |       |  |
| Age-adjusted                    | 1 | Referent | 1.12 | 0.92, 1.37 | 1.28 | 0.87, 1.87 | 0.13 | 1.11 | 0.87, 1.41 | 1.00 | 0.77, 1.30 | 1.11 | 0.84, 1.47 | 0.66  |  |
| Multivariate <sup>d</sup>       | 1 | Referent | 1.04 | 0.85, 1.27 | 1.11 | 0.75, 1.64 | 0.57 | 1.05 | 0.82, 1.34 | 0.92 | 0.70, 1.20 | 0.98 | 0.73, 1.31 | 0.65  |  |
| <b>MSI-high</b>                 |   |          |      |            |      |            |      |      |            |      |            |      |            |       |  |
| N                               |   | 15       |      | 39         |      | 6          |      | 14   |            | 14   |            | 16   |            |       |  |
| Age-adjusted                    | 1 | Referent | 2.12 | 1.16, 3.87 | 3.05 | 1.17, 7.97 | 0.01 | 1.69 | 0.81, 3.51 | 1.89 | 0.91, 3.95 | 3.06 | 1.49, 6.29 | 0.003 |  |
| Multivariate <sup>d</sup>       | 1 | Referent | 1.95 | 1.06, 3.56 | 2.55 | 0.97, 6.72 | 0.02 | 1.62 | 0.78, 3.38 | 1.68 | 0.80, 3.51 | 2.70 | 1.31, 5.58 | 0.01  |  |
| <b>BRAF mutation status</b>     |   | (0.36)   |      |            |      |            |      |      | (0.14)     |      |            |      |            |       |  |
| <b>BRAF-wildtype</b>            |   |          |      |            |      |            |      |      |            |      |            |      |            |       |  |
| N                               |   | 184      |      | 264        |      | 35         |      | 115  |            | 97   |            | 75   |            |       |  |
| Age-adjusted                    | 1 | Referent | 1.15 | 0.95, 1.39 | 1.37 | 0.95, 1.98 | 0.06 | 1.11 | 0.88, 1.40 | 1.08 | 0.84, 1.39 | 1.14 | 0.87, 1.50 | 0.39  |  |
| Multivariate <sup>d</sup>       | 1 | Referent | 1.07 | 0.87, 1.30 | 1.19 | 0.82, 1.74 | 0.34 | 1.05 | 0.83, 1.34 | 0.99 | 0.77, 1.28 | 1.01 | 0.76, 1.35 | 0.95  |  |
| <b>BRAF-mutated</b>             |   |          |      |            |      |            |      |      |            |      |            |      |            |       |  |
| N                               |   | 12       |      | 27         |      | 3          |      | 11   |            | 5    |            | 12   |            |       |  |
| Age-adjusted                    | 1 | Referent | 1.86 | 0.94, 3.71 | 1.59 | 0.44, 5.73 | 0.13 | 1.64 | 0.72, 3.76 | 0.88 | 0.31, 2.50 | 2.64 | 1.16, 5.99 | 0.07  |  |
| Multivariate <sup>d</sup>       | 1 | Referent | 1.73 | 0.87, 3.45 | 1.42 | 0.39, 5.13 | 0.21 | 1.58 | 0.69, 3.62 | 0.79 | 0.27, 2.26 | 2.37 | 1.04, 5.42 | 0.12  |  |
| <b>DNMT3B expression status</b> |   | (0.56)   |      |            |      |            |      |      | (0.04)     |      |            |      |            |       |  |
| <b>DNMT3B-negative</b>          |   |          |      |            |      |            |      |      |            |      |            |      |            |       |  |
| N                               |   | 95       |      | 145        |      | 12         |      | 68   |            | 46   |            | 35   |            |       |  |
| Age-adjusted                    | 1 | Referent | 1.26 | 0.96, 1.63 | 0.81 | 0.44, 1.48 | 0.50 | 1.34 | 0.98, 1.84 | 1.02 | 0.71, 1.45 | 1.00 | 0.67, 1.48 | 0.69  |  |
| Multivariate <sup>d</sup>       | 1 | Referent | 1.18 | 0.90, 1.54 | 0.71 | 0.39, 1.32 | 0.96 | 1.29 | 0.93, 1.77 | 0.95 | 0.66, 1.37 | 0.89 | 0.59, 1.33 | 0.32  |  |
| <b>DNMT3B-positive</b>          |   |          |      |            |      |            |      |      |            |      |            |      |            |       |  |
| N                               |   | 14       |      | 18         |      | 5          |      | 4    |            | 7    |            | 12   |            |       |  |
| Age-adjusted                    | 1 | Referent | 0.99 | 0.49, 2.01 | 2.21 | 0.78, 6.23 | 0.32 | 0.51 | 0.17, 1.56 | 0.97 | 0.39, 2.43 | 2.23 | 1.01, 4.90 | 0.03  |  |
| Multivariate <sup>d</sup>       | 1 | Referent | 0.89 | 0.44, 1.81 | 1.91 | 0.67, 5.44 | 0.52 | 0.48 | 0.16, 1.46 | 0.86 | 0.34, 2.16 | 1.92 | 0.86, 4.28 | 0.07  |  |

CI, confidence interval; CIMP, CpG island methylator phenotype; DNMT3B, DNA methyltransferase 3B; HR, hazard ratio; MSI, microsatellite instability; MSS, microsatellite stable; N, No. of cases.

<sup>a</sup> All models were stratified with age.

<sup>b</sup> Based on the liner trend test by using the median value of each category.

<sup>c</sup> Tests for heterogeneity (for a multivariate HR linear trend) of the associations of smoking with one molecular subtype versus the other molecular subtype (i.e., CIMP-low/negative vs. CIMP-high; MSS vs. MSI-high; *BRAF*-wildtype vs. *BRAF*-mutated; DNMT3B-negative vs. DNMT3B-positive).

<sup>d</sup> Models were adjusted for body mass index, family history of colorectal cancer in any first-degree relative, regular use of aspirin, physical activity level, alcohol consumption, total caloric intake and red meat intake.

Web Table 7. Pack-years Smoked Before Age 30, Age at Start Smoking and Incident Colorectal Cancer Risk by Molecular Subtypes<sup>a</sup> in the Nurses' Health Study (1980-2008) or the Health Professionals Follow-up Study (1986-2008)

|                              | Never     | Pack-years smoked before age 30 |         |            |         |            | Age at start of smoking                                  |         |            |         |            |                                                          |
|------------------------------|-----------|---------------------------------|---------|------------|---------|------------|----------------------------------------------------------|---------|------------|---------|------------|----------------------------------------------------------|
|                              |           | HR                              | 1-9     |            | ≥10     |            | $P_{\text{trend}}^b$<br>( $P_{\text{heterogeneity}}^c$ ) | ≥20     |            | <20     |            | $P_{\text{trend}}^b$<br>( $P_{\text{heterogeneity}}^c$ ) |
|                              |           | HR                              | 95% CI  | HR         | 95% CI  |            | HR                                                       | 95% CI  | HR         | 95% CI  |            |                                                          |
| <b>Women</b>                 |           |                                 |         |            |         |            |                                                          |         |            |         |            |                                                          |
| Person-years                 | 1,012,758 |                                 | 929,803 |            | 282,366 |            |                                                          | 532,947 |            | 737,349 |            |                                                          |
| <b>All colorectal cancer</b> |           |                                 |         |            |         |            |                                                          |         |            |         |            |                                                          |
| N                            | 285       |                                 | 306     |            | 96      |            |                                                          | 199     |            | 226     |            |                                                          |
| Age-adjusted                 | 1         | Referent                        | 1.19    | 1.01, 1.39 | 1.21    | 0.96, 1.53 | 0.05                                                     | 1.22    | 1.02, 1.47 | 1.19    | 0.99, 1.41 | 0.04                                                     |
| Multivariate <sup>d</sup>    | 1         | Referent                        | 1.19    | 1.00, 1.40 | 1.20    | 0.95, 1.52 | 0.07                                                     | 1.22    | 1.02, 1.47 | 1.18    | 0.99, 1.42 | 0.06                                                     |
| <b>CIMP status</b>           |           |                                 |         |            |         |            |                                                          |         |            |         |            |                                                          |
|                              |           |                                 |         |            |         | (0.58)     |                                                          |         |            |         | (0.52)     |                                                          |
| CIMP-low/negative            |           |                                 |         |            |         |            |                                                          |         |            |         |            |                                                          |
| N                            | 218       |                                 | 232     |            | 71      |            |                                                          | 153     |            | 169     |            |                                                          |
| Age-adjusted                 | 1         | Referent                        | 1.17    | 0.98, 1.41 | 1.16    | 0.89, 1.52 | 0.16                                                     | 1.25    | 1.01, 1.53 | 1.14    | 0.93, 1.40 | 0.15                                                     |
| Multivariate <sup>d</sup>    | 1         | Referent                        | 1.18    | 0.97, 1.42 | 1.15    | 0.88, 1.52 | 0.20                                                     | 1.25    | 1.01, 1.54 | 1.14    | 0.93, 1.41 | 0.17                                                     |
| CIMP-high                    |           |                                 |         |            |         |            |                                                          |         |            |         |            |                                                          |
| N                            | 53        |                                 | 63      |            | 19      |            |                                                          | 41      |            | 45      |            |                                                          |
| Age-adjusted                 | 1         | Referent                        | 1.32    | 0.92, 1.91 | 1.33    | 0.78, 2.24 | 0.18                                                     | 1.30    | 0.86, 1.95 | 1.33    | 0.89, 1.99 | 0.15                                                     |
| Multivariate <sup>d</sup>    | 1         | Referent                        | 1.33    | 0.92, 1.92 | 1.32    | 0.78, 2.24 | 0.20                                                     | 1.30    | 0.86, 1.96 | 1.33    | 0.89, 1.99 | 0.16                                                     |
| <b>MSI status</b>            |           |                                 |         |            |         |            |                                                          |         |            |         |            |                                                          |
|                              |           |                                 |         |            |         | (0.73)     |                                                          |         |            |         | (0.48)     |                                                          |
| MSS                          |           |                                 |         |            |         |            |                                                          |         |            |         |            |                                                          |
| N                            | 223       |                                 | 234     |            | 72      |            |                                                          | 157     |            | 168     |            |                                                          |
| Age-adjusted                 | 1         | Referent                        | 1.16    | 0.96, 1.39 | 1.15    | 0.88, 1.50 | 0.20                                                     | 1.24    | 1.01, 1.53 | 1.11    | 0.91, 1.36 | 0.23                                                     |
| Multivariate <sup>d</sup>    | 1         | Referent                        | 1.16    | 0.96, 1.40 | 1.14    | 0.87, 1.49 | 0.26                                                     | 1.25    | 1.01, 1.54 | 1.11    | 0.90, 1.37 | 0.27                                                     |
| MSI-high                     |           |                                 |         |            |         |            |                                                          |         |            |         |            |                                                          |
| N                            | 48        |                                 | 60      |            | 15      |            |                                                          | 38      |            | 40      |            |                                                          |
| Age-adjusted                 | 1         | Referent                        | 1.41    | 0.96, 2.06 | 1.17    | 0.65, 2.10 | 0.33                                                     | 1.34    | 0.87, 2.05 | 1.32    | 0.86, 2.01 | 0.18                                                     |
| Multivariate <sup>d</sup>    | 1         | Referent                        | 1.40    | 0.95, 2.05 | 1.17    | 0.65, 2.10 | 0.35                                                     | 1.33    | 0.87, 2.05 | 1.32    | 0.86, 2.02 | 0.19                                                     |

|                                    |   |          |      |            |      |            |        |      |            |      |            |        |
|------------------------------------|---|----------|------|------------|------|------------|--------|------|------------|------|------------|--------|
| <b><i>BRAF</i> mutation status</b> |   |          |      |            |      |            | (0.80) |      |            |      |            | (0.47) |
| <i>BRAF</i> -wildtype              |   |          |      |            |      |            |        |      |            |      |            |        |
| N                                  |   | 220      |      | 236        |      | 74         |        |      | 153        |      | 177        |        |
| Age-adjusted                       | 1 | Referent | 1.19 | 0.99, 1.43 | 1.20 | 0.92, 1.57 | 0.10   | 1.23 | 1.00, 1.51 | 1.20 | 0.98, 1.46 | 0.06   |
| Multivariate <sup>d</sup>          | 1 | Referent | 1.18 | 0.98, 1.43 | 1.19 | 0.91, 1.56 | 0.14   | 1.23 | 0.99, 1.51 | 1.19 | 0.97, 1.46 | 0.08   |
| <i>BRAF</i> -mutated               |   |          |      |            |      |            |        |      |            |      |            |        |
| N                                  |   | 55       |      | 61         |      | 16         |        |      | 44         |      | 36         |        |
| Age-adjusted                       | 1 | Referent | 1.22 | 0.85, 1.76 | 1.06 | 0.60, 1.85 | 0.61   | 1.37 | 0.92, 2.03 | 0.98 | 0.64, 1.50 | 0.90   |
| Multivariate <sup>d</sup>          | 1 | Referent | 1.22 | 0.84, 1.76 | 1.05 | 0.60, 1.84 | 0.64   | 1.37 | 0.92, 2.04 | 0.98 | 0.64, 1.50 | 0.93   |
| <b>DNMT3B expression status</b>    |   |          |      |            |      |            | (0.09) |      |            |      |            | (0.02) |
| DNMT3B-negative                    |   |          |      |            |      |            |        |      |            |      |            |        |
| N                                  |   | 143      |      | 162        |      | 46         |        |      | 103        |      | 118        |        |
| Age-adjusted                       | 1 | Referent | 1.22 | 0.98, 1.53 | 1.16 | 0.83, 1.62 | 0.22   | 1.23 | 0.95, 1.58 | 1.23 | 0.96, 1.57 | 0.09   |
| Multivariate <sup>d</sup>          | 1 | Referent | 1.21 | 0.96, 1.53 | 1.13 | 0.81, 1.59 | 0.31   | 1.22 | 0.94, 1.58 | 1.21 | 0.94, 1.56 | 0.12   |
| DNMT3B-positive                    |   |          |      |            |      |            |        |      |            |      |            |        |
| N                                  |   | 38       |      | 22         |      | 8          |        |      | 17         |      | 15         |        |
| Age-adjusted                       | 1 | Referent | 0.64 | 0.38, 1.09 | 0.70 | 0.32, 1.51 | 0.20   | 0.76 | 0.43, 1.36 | 0.58 | 0.32, 1.05 | 0.07   |
| Multivariate <sup>d</sup>          | 1 | Referent | 0.64 | 0.37, 1.08 | 0.68 | 0.32, 1.48 | 0.18   | 0.77 | 0.43, 1.36 | 0.57 | 0.31, 1.03 | 0.06   |
| <b>Men</b>                         |   |          |      |            |      |            |        |      |            |      |            |        |
| Person-years                       |   | 370,397  |      | 155,258    |      | 278,104    |        |      | 211,436    |      | 239,430    |        |
| <b>All colorectal cancer</b>       |   |          |      |            |      |            |        |      |            |      |            |        |
| N                                  |   | 205      |      | 108        |      | 204        |        |      | 148        |      | 176        |        |
| Age-adjusted                       | 1 | Referent | 1.06 | 0.84, 1.34 | 1.15 | 0.95, 1.40 | 0.08   | 1.05 | 0.85, 1.30 | 1.20 | 0.98, 1.48 | 0.08   |
| Multivariate <sup>d</sup>          | 1 | Referent | 0.99 | 0.78, 1.25 | 1.03 | 0.84, 1.26 | 0.50   | 0.97 | 0.78, 1.21 | 1.09 | 0.88, 1.34 | 0.46   |
| <b>CIMP status</b>                 |   |          |      |            |      |            | (0.06) |      |            |      |            | (0.12) |
| CIMP-low/negative                  |   |          |      |            |      |            |        |      |            |      |            |        |
| N                                  |   | 159      |      | 90         |      | 151        |        |      | 121        |      | 132        |        |
| Age-adjusted                       | 1 | Referent | 1.14 | 0.88, 1.48 | 1.10 | 0.88, 1.38 | 0.30   | 1.11 | 0.87, 1.41 | 1.17 | 0.93, 1.48 | 0.18   |
| Multivariate <sup>d</sup>          | 1 | Referent | 1.06 | 0.81, 1.38 | 0.99 | 0.78, 1.24 | 0.93   | 1.03 | 0.81, 1.32 | 1.05 | 0.83, 1.34 | 0.67   |
| CIMP-high                          |   |          |      |            |      |            |        |      |            |      |            |        |
| N                                  |   | 18       |      | 11         |      | 31         |        |      | 16         |      | 26         |        |
| Age-adjusted                       | 1 | Referent | 1.27 | 0.60, 2.71 | 2.00 | 1.11, 3.59 | 0.02   | 1.22 | 0.62, 2.41 | 1.96 | 1.07, 3.60 | 0.03   |
| Multivariate <sup>d</sup>          | 1 | Referent | 1.16 | 0.54, 2.48 | 1.77 | 0.98, 3.20 | 0.04   | 1.11 | 0.56, 2.19 | 1.75 | 0.95, 3.21 | 0.07   |

|                                 |   |          |      |            |      |            |        |      |            |      |            |        |
|---------------------------------|---|----------|------|------------|------|------------|--------|------|------------|------|------------|--------|
| <b>MSI status</b>               |   |          |      |            |      |            | (0.02) |      |            |      |            | (0.22) |
| <b>MSS</b>                      |   |          |      |            |      |            |        |      |            |      |            |        |
| N                               |   | 177      |      | 89         |      | 168        |        |      | 118        |      | 150        |        |
| Age-adjusted                    | 1 | Referent | 1.00 | 0.77, 1.29 | 1.09 | 0.88, 1.35 | 0.28   | 0.96 | 0.76, 1.22 | 1.18 | 0.94, 1.47 | 0.17   |
| Multivariate <sup>d</sup>       | 1 | Referent | 0.93 | 0.72, 1.21 | 0.99 | 0.80, 1.24 | 0.84   | 0.90 | 0.70, 1.14 | 1.07 | 0.85, 1.35 | 0.59   |
| <b>MSI-high</b>                 |   |          |      |            |      |            |        |      |            |      |            |        |
| N                               |   | 15       |      | 15         |      | 30         |        |      | 25         |      | 20         |        |
| Age-adjusted                    | 1 | Referent | 2.17 | 1.05, 4.47 | 2.41 | 1.29, 4.51 | 0.003  | 2.46 | 1.29, 4.70 | 1.86 | 0.95, 3.65 | 0.07   |
| Multivariate <sup>d</sup>       | 1 | Referent | 2.03 | 0.98, 4.18 | 2.18 | 1.16, 4.10 | 0.01   | 2.29 | 1.20, 4.38 | 1.68 | 0.85, 3.31 | 0.13   |
| <b>BRAF mutation status</b>     |   |          |      |            |      |            | (0.09) |      |            |      |            | (0.05) |
| <b>BRAF-wildtype</b>            |   |          |      |            |      |            |        |      |            |      |            |        |
| N                               |   | 184      |      | 98         |      | 179        |        |      | 136        |      | 151        |        |
| Age-adjusted                    | 1 | Referent | 1.07 | 0.83, 1.37 | 1.13 | 0.92, 1.38 | 0.16   | 1.07 | 0.86, 1.34 | 1.14 | 0.92, 1.42 | 0.24   |
| Multivariate <sup>d</sup>       | 1 | Referent | 1.00 | 0.78, 1.28 | 1.02 | 0.83, 1.27 | 0.63   | 1.00 | 0.80, 1.26 | 1.04 | 0.83, 1.30 | 0.73   |
| <b>BRAF-mutated</b>             |   |          |      |            |      |            |        |      |            |      |            |        |
| N                               |   | 12       |      | 7          |      | 21         |        |      | 9          |      | 20         |        |
| Age-adjusted                    | 1 | Referent | 1.24 | 0.49, 3.14 | 1.92 | 0.95, 3.90 | 0.03   | 1.07 | 0.45, 2.56 | 2.36 | 1.15, 4.87 | 0.02   |
| Multivariate <sup>d</sup>       | 1 | Referent | 1.18 | 0.47, 3.00 | 1.74 | 0.85, 3.55 | 0.06   | 1.01 | 0.42, 2.42 | 2.15 | 1.04, 4.45 | 0.03   |
| <b>DNMT3B expression status</b> |   |          |      |            |      |            | (0.64) |      |            |      |            | (0.89) |
| <b>DNMT3B-negative</b>          |   |          |      |            |      |            |        |      |            |      |            |        |
| N                               |   | 95       |      | 60         |      | 85         |        |      | 76         |      | 73         |        |
| Age-adjusted                    | 1 | Referent | 1.26 | 0.91, 1.74 | 1.05 | 0.78, 1.40 | 0.65   | 1.19 | 0.88, 1.62 | 1.09 | 0.80, 1.49 | 0.53   |
| Multivariate <sup>d</sup>       | 1 | Referent | 1.20 | 0.86, 1.67 | 0.96 | 0.71, 1.29 | 0.82   | 1.13 | 0.83, 1.54 | 1.00 | 0.73, 1.38 | 0.95   |
| <b>DNMT3B-positive</b>          |   |          |      |            |      |            |        |      |            |      |            |        |
| N                               |   | 14       |      | 5          |      | 16         |        |      | 10         |      | 13         |        |
| Age-adjusted                    | 1 | Referent | 0.75 | 0.27, 2.08 | 1.20 | 0.59, 2.45 | 0.43   | 0.99 | 0.44, 2.25 | 1.24 | 0.58, 2.66 | 0.59   |
| Multivariate <sup>d</sup>       | 1 | Referent | 0.68 | 0.24, 1.88 | 1.05 | 0.51, 2.16 | 0.69   | 0.92 | 0.40, 2.09 | 1.08 | 0.50, 2.33 | 0.86   |

CI, confidence interval; CIMP, CpG island methylator phenotype; DNMT3B, DNA methyltransferase 3B; HR, hazard ratio; MSI, microsatellite instability; MSS, microsatellite stable; N, No. of cases.

<sup>a</sup> All models were stratified with age.

<sup>b</sup> Based on the liner trend test by using the median value of each category.

<sup>c</sup> Tests for heterogeneity (for a multivariate HR linear trend) of the associations of smoking with one molecular subtype versus the other molecular subtype (i.e., CIMP-low/negative vs. CIMP-high; MSS vs. MSI-high; *BRAF*-wildtype vs. *BRAF*-mutated; DNMT3B-negative vs. DNMT3B-positive).

<sup>d</sup> Models were adjusted for body mass index, family history of colorectal cancer in any first-degree relative, regular use of aspirin, physical activity level, alcohol consumption, total caloric intake and red meat intake.

## Web Figure legend

Web Figure 1. Restricted cubic splines to demonstrate the relationship between smoking cessation duration (year) and colorectal cancer risk by molecular subtypes in the Nurses' Health Study (1980-2008) and the Health Professionals Follow-up Study (1986-2008). Multivariate hazards ratio (the solid line) with 95% confidence interval (the dashed lines) is shown. (A) CIMP-low/negative colorectal cancer risk. (B) CIMP-high colorectal cancer risk. (C) MSS colorectal cancer risk. (D) MSI-high colorectal cancer risk. (E) DNMT3B-negative colorectal cancer risk. (F) DNMT3B-positive colorectal cancer risk.

CIMP, CpG island methylator phenotype; DNMT3B, DNA methyltransferase 3B; MSI, microsatellite instability; MSS, microsatellite stable.

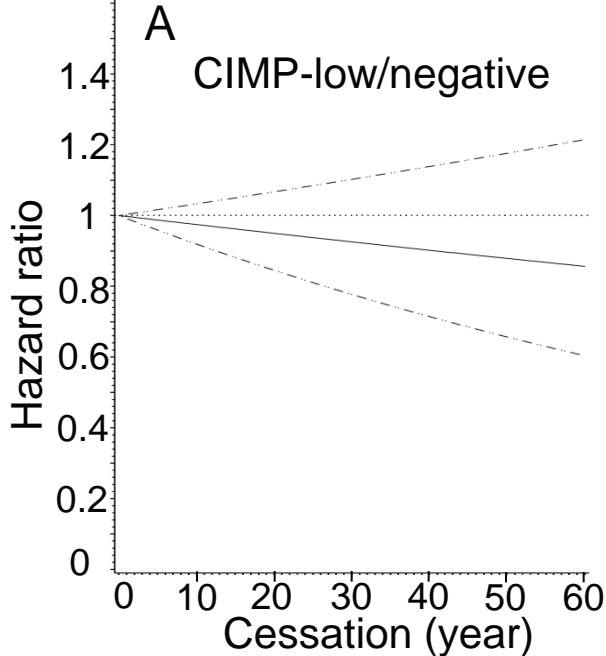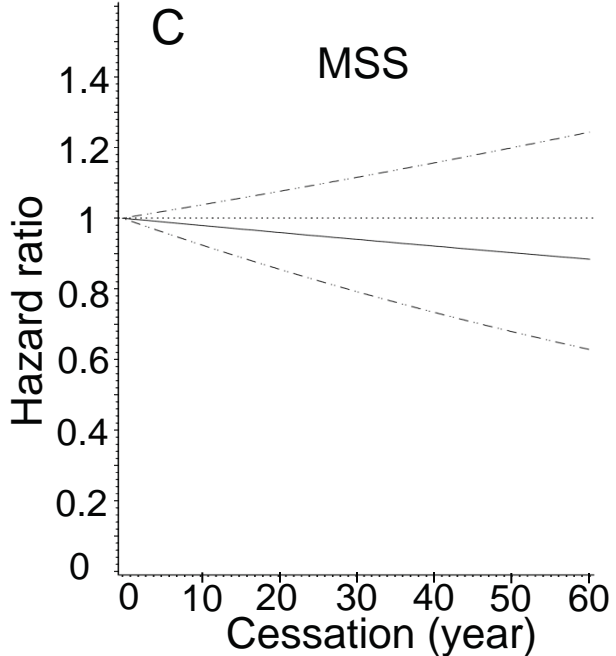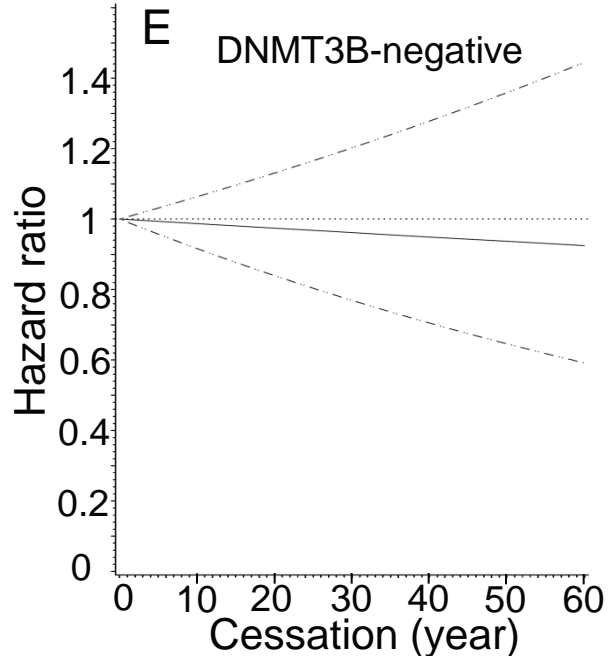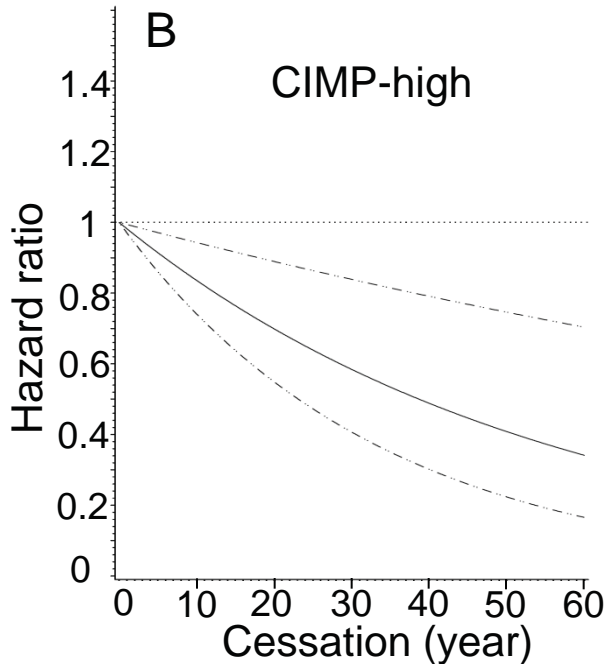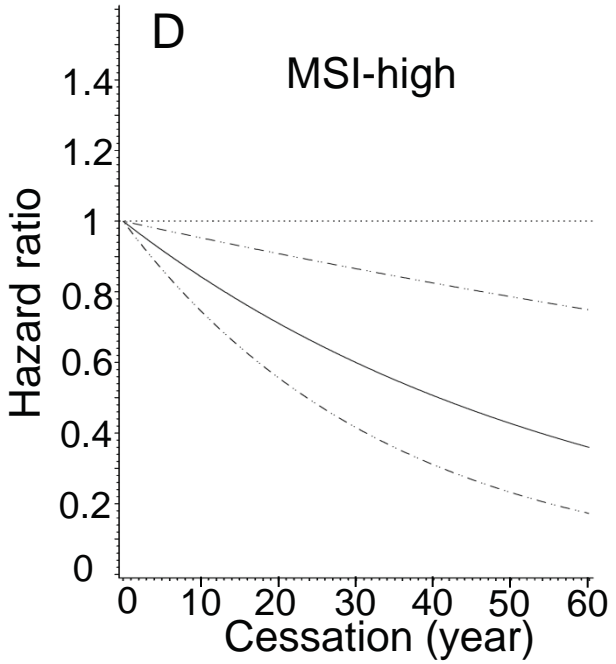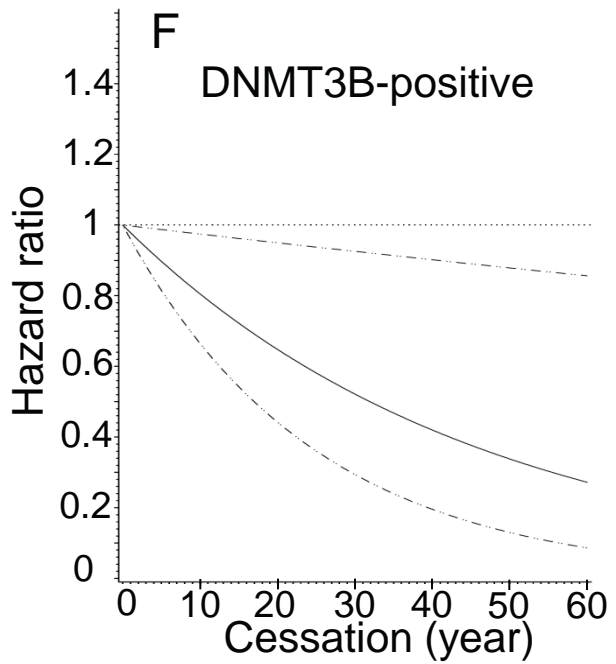

**Web Figure 1**
